1 **Title**

2 Live imaging of hair bundle polarity acquisition in the mouse utricle demonstrates a critical  
3 timeline for transcription factor Emx2

4

5 **Authors**

6 Yosuke Tona and Doris K. Wu<sup>‡</sup>

7

8 **Affiliation**

9 National Institute on Deafness and Other Communication Disorders, National Institutes of  
10 Health, Bethesda, MD 20892, USA

11

12 <sup>‡</sup> **Author for correspondence** ([wud@nidcd.nih.gov](mailto:wud@nidcd.nih.gov))

13

14

15 **ABSTRACT**

16 The asymmetric hair bundle on top of hair cells (HCs), comprises a kinocilium and stereocilia  
17 staircase, dictates HC directional sensitivity. The mother centriole (MC) forms the base of the  
18 kinocilium, where stereocilia are subsequently built next to it. Previously we showed that  
19 transcription factor *Emx2* reverses hair bundle orientation and its expression in the mouse  
20 vestibular utricle is restricted, resulting in two regions of opposite bundle orientation (Jiang et al,  
21 2017). Here, we investigated establishment of opposite bundle orientation in embryonic utricles  
22 by live-imaging GFP-labeled centrioles in HCs. The daughter centriole invariably migrated  
23 ahead of the MC from the center to their respective peripheral locations in HCs. Comparing HCs  
24 between utricular regions, centriole trajectories were similar but they migrated towards opposite  
25 directions, suggesting that *Emx2* pre-patterned HCs prior to centriole migration. Ectopic *Emx2*,  
26 however, reversed centriole trajectory within hours during a critical time-window when centriole  
27 trajectory was responsive to *Emx2*.

## 28 INTRODUCTION

29 The mammalian inner ear comprises six major sensory organs including the cochlea, two  
30 maculae and three cristae. The cochlea detects sound, whereas the maculae and cristae detect  
31 linear accelerations and angular velocity of head movements, respectively. Each sensory organ  
32 consists of sensory hair cells (HCs), which are the mechano-transducers of sound and head  
33 movements, and each HC is surrounded by supporting cells. Erected on the apical surface of  
34 HCs is the stereociliary bundle/hair bundle, which is comprised of a stereociliary staircase that is  
35 tethered to the tallest rod of the bundle, the kinocilium. When the hair bundle is deflected  
36 towards the kinocilium, the mechano-transducer channels on the tips of the stereocilia open,  
37 which allow entry of positive ions and activation of the HC (Shotwell et al., 1981). Thus,  
38 orientation of the hair bundle provides the directional sensitivity of its HC.

39 Each sensory organ of the inner ear exhibits a defined hair bundle orientation pattern  
40 among HCs. Unlike other sensory organs in which hair bundles are unidirectional, the macula of  
41 the utricle and saccule exhibit an opposite bundle orientation pattern. Each macula can be  
42 divided by a line of polarity reversal (LPR) into two regions, across which the hair bundles are  
43 arranged in opposite orientations (Fig. 1A; (Flock, 1964)). Although proper alignment of the  
44 hair bundles in sensory organs requires the Wnt signaling pathway and the core planar cell  
45 polarity pathway (Dabdoub et al., 2003, Goodrich and Strutt, 2011, Jones et al., 2014, Lee et al.,  
46 2012, Montcouquiol et al., 2003, Montcouquiol et al., 2006), the LPR in the maculae is generated  
47 by the transcription factor *Emx2*. The restricted expression of *Emx2* to one side of the LPR  
48 causes hair bundles within to reverse their orientation by 180 degrees (Fig. 1A, green color;  
49 (Jiang et al., 2017, Holley et al., 2010)). In *Emx2* knockout or Gain-of-function utricles, the LPR  
50 is absent and all hair bundles are unidirectional (Fig. 1B).

51 Largely based on scanning electron microscopy and immunostaining results, it is thought  
52 that the hair bundle is established by first docking of the mother centriole (MC) to the apical  
53 center of a nascent HC, where the MC forms the base of the kinocilium (Lu and Sipe, 2016).  
54 Then, the kinocilium is relocated from the apical center of the HC to the periphery (Fig. 1C).  
55 After the kinocilium acquires its final position, the stereocilia staircase is gradually built next to  
56 the kinocilium (Lu and Sipe, 2016, Tarchini et al., 2013, Cotanche and Corwin, 1991, Tilney et  
57 al., 1992). The role of the daughter centriole (DC), the inherent partner of the MC, during hair

58 bundle establishment is not known but it is located slightly more peripheral and basal to the MC  
59 in mature HCs (Fig. 1A; (Sipe and Lu, 2011)).

60 *Emx2* has a conserved role in reversing hair bundle orientation in HCs of mice and  
61 zebrafish (Jiang et al., 2017). However, the timing of *Emx2* required to mediate hair bundle  
62 reversal is not clear. In other tissues such as the brain, olfactory epithelium and urogenital  
63 system, *Emx2* is suggested to function as a patterning gene since the lack of *Emx2* affects  
64 regional formation of these tissues (Miyamoto et al., 1997, Pellegrini et al., 1996). Thus, *Emx2*  
65 could have a similar role in patterning the lateral utricle or specifying the fate of HCs, which  
66 indirectly leads to hair bundle reversal. However, *Emx2* is known to require the LGN/*Insc*/*Gai*  
67 complex in mediating hair bundle reversal (Jiang et al., 2017). The LGN/*Insc*/*Gai* complex  
68 forms an asymmetrical crescent on the apical surface of cochlear HCs and this complex is  
69 important for guiding the kinocilium to its proper location for cochlear hair bundle establishment  
70 and for subsequent stereocilia staircase formation (Fig. 1C; (Ezan et al., 2013, Tarchini et al.,  
71 2013, Tarchini et al., 2016)). Therefore, regardless of the mechanisms or timing, *Emx2* executes  
72 hair bundle reversal by guiding centriole positioning.

73 In this study, we investigated the timing of *Emx2* in hair bundle reversal. We first live-  
74 imaged GFP-labeled centrioles in nascent utricular HCs to track the process of hair bundle  
75 polarity acquisition. Then, we compared centriole migration trajectories between the *Emx2*-  
76 positive HCs in the lateral and *Emx2*-negative HCs in the medial utricle to determine whether  
77 there is a fundamental difference in their hair bundle polarity establishment (Fig. 2B). We found  
78 that there were no obvious differences between medial and lateral HCs in the centriole migration  
79 pattern, other than their opposite direction of trajectory. These results indicate that *Emx2* has  
80 pre-patterned the HCs prior to centriole migration. However, ectopic *Emx2* in naïve medial  
81 utricular HCs demonstrated that *Emx2* can alter preset centriole trajectories within 12 hours (hrs)  
82 and there is a critical time window for centrioles to respond to *Emx2*. Furthermore, our live-  
83 imaging results showed dynamic relationships between the MC and DC, suggesting that the DC  
84 may have an active role in guiding the MC. Disruption of microtubule experiments indicate that  
85 both centrioles are actively being pulled to its peripheral location via the microtubule network,  
86 and ninein, a centrosomal protein, may anchor microtubules to facilitate centriole migration.

## 87 RESULTS

### 88 Migration of DC precedes MC in medial utricular HCs during hair bundle establishment

89 To address how hair bundles are established across the LPR in the macular organs, we first live-  
90 imaged centriole movements as a proxy for hair bundle orientation establishment in medial  
91 utricular HCs (MHCs) of *Atoh1<sup>Cre</sup>; Rosa<sup>tdT/+</sup>; GFP-Centrin2* mice at embryonic day (E) 13.5, in  
92 which all centrioles are GFP-positive and nascent HCs are tdTomato-positive (Fig. 2A,C-E, 3A-  
93 C). At this stage, most of the nascent HCs are located in the Emx2-negative, medial region of  
94 the utricle and few are in the Emx2-positive, lateral region (Fig. 2A; (Jiang et al., 2017, Yang et  
95 al., 2017)). Some of the MHCs are already polarized with the kinocilium asymmetrically located  
96 at the lateral periphery of the apical surface, whereas other immature HCs show the kinocilium at  
97 the center of the apical surface (Fig. 2A, S2a). In the course of our experiments, we tracked  
98 centriole movements in a total of 32 nascent MHCs for 24 hrs. Figures 2 and 3 illustrate the  
99 locations of two of these HCs (Fig. 2C, MHC1, 3A, MHC2) and their centriole movements (Fig.  
100 2D-E, 3B-C). The trajectories of centriole movements (Fig. 2D, 3B) and selected frames of the  
101 time-lapse recordings (Fig. 2E, 3C) are shown. The identity of the MC (Fig. 2D-E, 3B-C, yellow  
102 color) was determined based on its more apical location within the HC than the DC (Fig. 2D-E,  
103 3B-C, S2a, orange color; (Sipe and Lu, 2011)). The identity of the MC was further validated by  
104 its association with the kinocilium marker, Arl13b (Fig. S2a).

105 Based on tracking and analyses of trajectories and relationships between the MC and DC  
106 in MHCs, two phases of centriole movements emerged (Fig. 2D-E, S2b, video 1). In Phase I, the  
107 MC (yellow arrowhead) was positioned near the center of HC's apical surface, whereas the DC  
108 (orange arrowhead) moved rapidly and sporadically around the MC (Fig. 2D#1, 2E#1-3, 3B#1,  
109 3C#1-3). The distance between the two centrioles was variable during Phase I (Fig. S2bA), in  
110 which the two centrioles could be far apart (Fig. 3C#1) or longitudinally aligned (Fig. 2E#3,  
111 3C#3). The speed of the DC was also faster, up to 1.2  $\mu\text{m}$  per a 10-minute time frame (orange),  
112 whereas the speed of the MC (yellow) was more stable, not exceeding 0.5  $\mu\text{m}$  per time frame  
113 after correcting for HC drift (Fig. S2bB, MHC1:  $p=1.1 \times 10^{-6}$ , MHC2:  $p=0.015$ ). By contrast,  
114 Phase II was characterized by the DC showing directional movements towards the lateral utricle  
115 (Fig. 2D#2, 2E#4-5, 3B#2, 3C#4-5) where the kinocilium of MHCs will subsequently reside in  
116 the lateral periphery (white arrow). Then, the MC migrated towards the direction of the DC (Fig.  
117 2D#3-4, 2E#6-7, 3B#3-4, 3C#6-7). The DC continued to move faster than the MC in Phase II

118 (Fig. S2bB, MHC1:  $p=2.3 \times 10^{-5}$ , MHC2:  $p=4.7 \times 10^{-6}$ ) and the average distance between the two  
119 centrioles in Phase II was significantly further apart than in Phase I (Fig. S2bA, MHC1:  
120  $p=8.0 \times 10^{-8}$ , MHC2:  $p=2.0 \times 10^{-5}$ ).

121

### 122 **Lateral HCs show trajectories of MC and DC similar to medial HCs**

123 Hair bundles in the lateral utricle are in opposite orientation from the default hair bundles in the  
124 medial utricle (Fig. 1A). We investigated whether centrioles in the *Emx2*-positive HCs migrate  
125 directly to their destined position in the medial periphery or they first migrate to the lateral  
126 position before relocating to the medial destined position (Fig. 2B). Since most of the HCs in  
127 the lateral utricle initiate terminal mitosis at E14.5 or later (Jiang et al., 2017), live-imaging of  
128 E13.5 utricular explants was extended to 41 hrs (Fig. 2F-H, S2cA-E). At the beginning of  
129 recordings, tdTomato-positive HCs were only found in the medial utricle. Twenty hrs into  
130 imaging, several HCs emerged in the lateral region of the utricle and their centrioles were  
131 positioned in the medial periphery of the apical surface of the HCs by the end of the recording  
132 (Fig. 2F, LHC1, S2cA, LHC2). Based on the positions of HCs at the end of the recordings, we  
133 re-traced and analyzed the centriole trajectories of 9 lateral HCs (LHCs). Trajectories of  
134 centrioles in LHCs can also be grouped into two phases similar to MHCs. In Phase I, the DC  
135 moved sporadically around the MC before or soon after the tdTomato signal was evident (Fig.  
136 2G#1-2, 2H#1-4, S2cB#1-2, S2cC#1-4, video 2). Then, in Phase II, the DC started to migrate  
137 towards the medial side, which was followed by the MC (Fig. 2G#3-4, 2H#5-7, S2cB#3-4,  
138 S2cC#5-7). Similar to MHCs, the average distance between the two centrioles was variable but  
139 closer in Phase I than in Phase II (Fig. S2cD, LHC1:  $p=2.7 \times 10^{-11}$ , LHC2:  $p=1.7 \times 10^{-17}$ ). Average  
140 moving speed of the DC was faster than that of the MC in each phase, although three out of nine  
141 LHCs failed to show a significant difference in speed between the two centrioles in Phase II (Fig  
142 S2cE, LHC1: Phase I  $p=0.0078$ , Phase II  $p=0.028$ , LHC2: Phase I  $p=0.048$ , Phase II  $p=0.19$ ).

143 Thus far, our analyses revealed that MHCs and LHCs show similar centriole trajectories  
144 in reaching their destinations in opposite sides of the HC. The two centrioles in the LHC moved  
145 directly toward the medial periphery (Fig. 2B#1) without first reaching the lateral periphery like  
146 in the MHC and then relocate to the medial periphery (#2). These results indicate that *Emx2* has  
147 already exerted its effects on the LHCs prior to hair bundle establishment. Notably, *Emx2*  
148 transcripts are detected in the lateral region at E11.5, three days ahead of HC formation that

149 begins at E14.5 (Fig. S2d; (Jiang et al., 2017)). Taken together, these results suggest that the  
150 mechanism of *Emx2* in altering hair bundle orientation in the lateral utricle could be indirect via  
151 possible regional patterning and/or HC fate determination.

152

### 153 **Reversing hair bundle orientation by ectopic *Emx2***

154 To gain further insight into the mechanism of *Emx2* in altering hair bundle orientation, we  
155 investigated the time it takes for ectopic *Emx2* to reverse hair bundle orientation in MHCs (Jiang  
156 et al., 2017). Since *Emx2* transcripts are detected in the lateral utricle three days earlier than  
157 LHC formation (Fig S2d; (Jiang et al., 2017)), we reasoned that if endogenous *Emx2* mediates  
158 hair bundle reversal via patterning or cell-fate change, effects of ectopic *Emx2* may be similar  
159 and should take days to reverse hair bundle orientation. We crossed two different strains of *cre*  
160 mice, *Atoh1<sup>Cre</sup>* or *Gfi1<sup>Cre</sup>* to *Rosa<sup>Emx2</sup>* mice, which resulted in some offspring showing specific  
161 expression of *Emx2* in all the HCs. Both *Atoh1* and *Gfi1* are the transcription factors important  
162 for HC formation (Bermingham et al., 1999, Wallis et al., 2003), and lack of *Atoh1* or *Gfi1*  
163 results in loss of HCs. *Atoh1* is the earliest known transcription factor that commits HC fate in  
164 the inner ear (Bermingham et al., 1999, Zheng and Gao, 2000). However, *Atoh1* expression is  
165 not affected in *Gfi1* knockout mice, suggesting that *Gfi1* is required later than *Atoh1* during HC  
166 differentiation (Wallis et al., 2003). Thus, the induction of *Emx2* using *Gfi1<sup>Cre</sup>* is expected to be  
167 later than that of *Atoh1<sup>Cre</sup>* in the HC lineage.

168 We first live-imaged *Atoh1<sup>Cre</sup>; Rosa<sup>Emx2/tdT</sup>; GFP-Centrin2* utricles (Fig. 3D-F), in which  
169 all MHCs showed opposite hair bundle orientation from controls by E15.5 (Fig. S3a). Live-  
170 imaging results showed that the trajectory of centrioles in MHCs ectopically expressing *Emx2*  
171 showed the DC moving around the MC sporadically (Fig. 3E#1, 3F#1-4), similar to normal  
172 MHCs at Phase I (Fig. 3B#1, 3C#1-3). Then, the DC migrated toward the medial periphery (Fig.  
173 3E#2-3, 3F#5-7, yellow arrow, video 3), opposite from the normal lateral direction (Fig. 3F,  
174 white arrow) and controls (Fig. 3B-C). This trajectory was followed by the MC. This pattern of  
175 centriole migration from center of the HC to the medial edge occurred in 60% of the HCs  
176 analyzed (Fig. 3J). The remaining HCs exhibited a pattern that is similar to the *Gfi1<sup>Cre</sup>;*  
177 *Rosa<sup>Emx2/tdT</sup>* MHCs described below, suggesting that there are two modes of centriole trajectory.

178 In *Gfi1<sup>Cre</sup>; Rosa<sup>Emx2/tdT</sup>* utricles (Fig. 3G-I), in which all the hair bundle orientation in  
179 MHCs are known to be reversed (Jiang et al., 2017), live imaging results showed that some of

180 the centriole trajectories were different from those in *Atoh1<sup>Cre</sup>; Rosa<sup>Emx2/tdT</sup>* utricles (Fig. 3G-J,  
181  $p=0.0010$ , Fig. S3bA-C). At the beginning of the recording, *Gfi1<sup>Cre</sup>; Rosa<sup>Emx2/tdT</sup>* MHCs  
182 analyzed already showed tdTomato expression and the DC was asymmetrically located towards  
183 the lateral side (Fig. 3H#1, 3I#1, MHC4, S3bC-C''#1, MHC5-7, white arrow, video 3),  
184 resembling MHCs at Phase II (Fig. 3C). Within 3 hrs (Fig. S3bC''#1-3, MHC6) to 9 hrs (Fig.  
185 3I#1-4, MHC4, S3bC'' #1-4 MHC7) of recordings, the DC remained lateral to the MC.  
186 Thereafter, the distance between the DC and MC was reduced and sometimes the two centrioles  
187 were transiently aligned longitudinally (Fig. 3I#5 MHC4, S3bC#5 MHC5, C''#5-6 MHC7).  
188 Then, the DC switched position to the medial side of MC (Fig. 3H#3, 3I#6-7, S3bC-C'', yellow  
189 arrow). These results suggest that in *Gfi1<sup>Cre</sup>; Rosa<sup>Emx2/tdT</sup>* MHCs, the centrioles are initially  
190 aligned in the normal lateral positions primed for hair bundle establishment but upon activation  
191 of *Emx2* transcription mediated by *Gfi1*-driven Cre, the two centrioles reverse their positions to  
192 the medial side. This lateral to medial centriole reversal pattern was also observed in *Atoh1<sup>Cre</sup>;*  
193 *Rosa<sup>Emx2/tdT</sup>* utricles but at a lower frequency than MHCs of *Gfi1<sup>Cre</sup>; Rosa<sup>Emx2/tdT</sup>* (Fig. 3J, 40% vs  
194 84.6%,  $p=0.0010$ ). These frequency differences in migration patterns between the two *cre* lines  
195 are consistent with the notion that *Emx2* activation using *Gfi1<sup>Cre</sup>* is later than *Atoh1<sup>Cre</sup>*, thus a  
196 higher percentage of centrioles in *Gfi1<sup>Cre</sup>* samples were observed to migrate from the destined  
197 lateral periphery towards the medial rather than directly from the central towards the lateral  
198 position (Fig. 3J, 84.6% vs 15.4%). Furthermore, our results indicate that centriole trajectory  
199 during both Phase I and II is plastic and can be altered by *Emx2*.

200

### 201 **Infections with AAV-Emx2 reverse hair bundle orientation**

202 Our time-lapse recordings showed that the longest time observed for *Gfi1<sup>Cre</sup>; Rosa<sup>Emx2/tdT</sup>*  
203 MHCs to reverse centriole positions from the lateral to medial periphery was approximately 12  
204 hrs (Fig. 3, MHC4, S3b, MHC7) suggesting that *Emx2* could exert its effects on hair bundle  
205 reversal within hours. However, the precise time frame between the onset of *Emx2* expression  
206 driven by *Gfi1*-Cre and reversal of centriole positions remains unclear. To further investigate the  
207 time required by *Emx2* to alter hair bundle orientation, we ectopically expressed *Emx2* in  
208 utricular explants using AAV2.7m8 adeno-associated virus, which has been shown to infect  
209 cochlear HCs efficiently (Isgrig et al., 2019). We infected *GFP-Centrin2* utricular explants at  
210 E13.5 with an AAV2.7m8 adeno-associated viral vector, AAV2.7m8-CAG-Emx2-P2A-



211 tdTomato (AAV-Emx2-tdT), in which both *Emx2* and *tdTomato* transcripts were driven under  
212 the universal CAG promoter. Forty-eight hrs after infection, approximately 70% of total HCs  
213 were infected (Fig 4C,  $71.1 \pm 6.3$  % with AAV-Emx2-tdT), which was similar to AAV-tdT  
214 controls ( $72.8 \pm 5.6$  %). The void of anti- $\beta$ 2-spectrin staining indicates the kinocilium position  
215 in the apical HC surface and reveals the hair bundle orientation (Deans et al., 2007). In AAV-  
216 tdT controls, infected HCs show normal hair bundle orientation (Fig. 4A,C). However,  $13.9 \pm$   
217  $7.2$  % of HCs infected with AAV-Emx2-tdT showed opposite kinocilium position (Fig 4B,C)  
218 versus none in controls, indicating that AAV-Emx2-tdT is sufficient to reverse hair bundle  
219 orientation.

220 Next, we live-imaged the centriole reversal process in AAV-Emx2-tdT infected *GFP-*  
221 *Centrin2* utricular cultures (Fig. 5A). At 24 hrs after viral infection, the majority of the cells in  
222 the utricular explants were tdTomato-negative (Fig 5B) but many HCs turned on tdTomato by 36  
223 hrs after infection (Fig. 5E,F). At the beginning of recordings, most of the infected MHCs  
224 showed the DC lateral to the MC, even though the outline of the HCs was not evident yet due to  
225 the lack of tdTomato signal (Fig. 5C-F#1, video 4). As tdTomato expression became apparent,  
226 the peripheral location of the two centrioles was confirmed, indicating that these cells were at the  
227 end of Phase II (Fig. 5E-F, MHC8, 21hrs, MHC9, 13 hrs). Then, the two centrioles moved to  
228 align longitudinally with each other transiently (Fig. 5E-F, small panel insets, 22.3 hrs for MHC8  
229 and 15 hrs for MHC9), followed by the DC moving medial to the MC (Fig. 5C#3, 5E 23.3-25.3  
230 hrs, MHC8, 5D#3, 5F 19.5-25.3 hrs, MHC9), suggesting a change in the course of DC trajectory  
231 from lateral to medial periphery. Quantification of tdTomato signal that was above background  
232 in infected cells showed that tdTomato signals were elevated by 9-12 hrs of imaging (Fig. 5A,G,  
233 1.5 days after infection), although the signals may not be apparent in the single time frame  
234 images (Fig. 5E,F). Then, DC positional reversal occurred within 10-12 hrs after the detectable  
235 tdTomato signals. Using positive tdTomato signals as a proxy for *Emx2* activation, these results  
236 suggest that *Emx2* can reverse centriole trajectory within 10-12 hrs. Thus, both the viral  
237 approach using AAV and genetic approach using *Gfi1<sup>Cre</sup>; Rosa<sup>Emx2/tdT</sup>* utricles suggest that *Emx2*  
238 is able to mediate hair bundle reversal within a short period of time (Fig. 5H) despite onset of  
239 endogenous *Emx2* expression occurring three days prior to HC formation (Fig. S2d).

240

241 **Microtubules are required to stabilize the asymmetrical location of the centrioles**

242 Thus far, our live-imaging results indicate that the migration of the DC always preceded  
243 that of the MC under either control or treated conditions. To identify potential qualitative  
244 differences between the two centrioles that could account for the migration pattern, we  
245 investigated their association with microtubules and proteins related to microtubule nucleation  
246 and anchoring. Using SiR-tubulin, a cell permeable fluorogenic probe for microtubules, we  
247 labeled microtubules in live *Atoh1<sup>Cre</sup>; Rosa<sup>tdT/+</sup>; GFP-Centrin2* utricular cultures. We showed  
248 that both centrioles were associated with microtubules in tdTomato-positive HCs determined to  
249 be Phase II, based on the position of the centrioles (Fig. 6A). Immunostaining with anti- $\gamma$ -  
250 tubulin antibodies indicated that both centrioles in Phase II HCs are associated with microtubule  
251 nucleation (Fig. 6B). Ninein is a centrosomal protein that has both microtubule nucleation and  
252 anchoring functions (Delgehr et al., 2005) and it is preferentially associated with the MC than  
253 the DC in somatic cells, serving its microtubule nucleation role (Betleja et al., 2018, Piel et al.,  
254 2000). In Phase I HCs, in which centrioles are centrally located, ninein staining was  
255 concentrated by the two centrioles (Fig. 6C, Phase I, n=6). As DC started to migrate towards the  
256 periphery and the two centrioles became further apart, ninein staining became broadly distributed  
257 surrounding both centrioles (early Phase II, n=17). However, ninein staining was concentrated at  
258 the centrioles again by the end of Phase II (Fig. 6C, n=21). This broad distribution of ninein  
259 staining beyond the centrioles during centriole migration suggests that ninein may serve as  
260 microtubule anchoring during this period.

261 Previous reports in cochlear explants proposed that microtubule plus ends attached to  
262 the LGN/Insc/Gai complex pulls the MC/kinocilium through microtubule shortening and/or  
263 dynein mediated mechanism to the periphery (Ezan et al., 2013). Blocking Gai with pertussis  
264 toxin disrupted the microtubule plus-end binding protein, EB1 and the kinocilium positioning.  
265 We tested this hypothesis in our live utricular culture and asked whether the DC behaves in a  
266 similar manner as MC. We treated utricular explants with nocodazole, which disrupts the  
267 microtubules by binding to free tubulin dimers and inhibits microtubule polymerization  
268 (Hoebeke et al., 1976). We focused our analysis on MHCs that were at the end of Phase II,  
269 which showed both centrioles located peripherally in the lateral region (Fig. 7A-C). Nocodazole  
270 was introduced at 1.5 hrs into live-imaging. Shortly after the addition of nocodazole, positions  
271 for both centrioles were affected and they returned to the center of the HC with the DC traveling  
272 more rapidly and sporadically around the relatively stable MC (Fig. 7B,C, 1.7-2.5 hrs),

273 resembling the behavior observed in Phase I of nascent HCs (Fig. 2). Once nocodazole was  
274 washed out, two centrioles returned to the lateral periphery within a few hrs with the DC moving  
275 ahead of the MC (Fig. 7C, 2.5-8 hrs, video 5). The acetylated-tubulin staining of HCs, which  
276 labels stable microtubules, showed a loss of tubulin arrays along with mislocalized centrioles  
277 from the periphery during nocodazole treatment (Fig. 7D). After nocodazole removal, tubulin  
278 arrays were re-established and centriole positions in the periphery recovered (Fig 7E). These  
279 results indicate that the maintenance of both the MC and DC in the periphery is dependent on an  
280 intact microtubule network and an active force that pulls both centrioles to the periphery.  
281

## 282 **Discussion**

### 283 **Hair bundle establishment in HCs**

284 Our live-imaging study is the first extensive time-lapse imaging of hair bundle acquisition in  
285 mammalian HCs. Imaging results of centriole migration in utricular HCs are consistent with a  
286 previous model extrapolated from results of SEM that the kinocilium starts out in the center of a  
287 HC before reaching its peripheral destination for hair bundle establishment (Dabdoub et al.,  
288 2003, Lu and Sipe, 2016, Denman-Johnson and Forge, 1999). Based on results in the chicken  
289 basilar papilla, it was proposed that the kinocilium undergoes fairly extensive migration along  
290 the periphery of the HC before reaching its final destination (Fig. 1A; (Cotanche and Corwin,  
291 1991, Tilney et al., 1992). However, more recent studies in the mouse cochlea suggest that the  
292 MC/kinocilium takes a more direct route from the center of the HC to its final destination in the  
293 periphery (Dabdoub et al., 2003, Lu and Sipe, 2016, Denman-Johnson and Forge, 1999,  
294 Montcouquiol et al., 2003). Our results are consistent with findings in the mouse that the  
295 MC/kinocilium and DC take a direct path to their destination in the periphery. Additionally, we  
296 found an intriguing centriole migration pattern for hair bundle establishment as discussed below.

297 It has been proposed that the migration of kinocilium to its destined location is achieved  
298 through an active force on centrioles via the microtubule network. This active force is suggested  
299 to be exerted through LGN/Insc/G $\alpha$ i complex on microtubules by recruiting Lis1/dynein and/or  
300 shortening of microtubule (Ezan et al., 2013, Lu and Sipe, 2016, Tarchini and Lu, 2019). Our  
301 nocodazole results supported this active force hypothesis. Furthermore, disruption of the  
302 microtubule network caused the centrioles to promptly return to their initial central location  
303 rather than to remain stationary at the periphery of HCs suggests that Lis1/dynein is a more  
304 likely mechanism than microtubule shortening. We reasoned that disruption of microtubule  
305 shortening should leave centrioles in position rather than return to its original central position of  
306 the HC. Furthermore, our nocodazole results indicate that the DC is likely to be under similar  
307 control of the LGN/Insc/G $\alpha$ i complex as the MC.

308 The directed migration of the centrioles depends on oriented microtubule arrangement of  
309 the minus ends at the centrioles and the plus ends at the periphery. This arrangement raises the  
310 possibility that proper anchoring of microtubules within HCs is an important factor. Among the  
311 anchoring proteins, we focused on ninein, which has both microtubule nucleation and anchoring  
312 functions (Delgehyr et al., 2005). It functions as a microtubule nucleation by docking  $\gamma$ -tubulin

313 to the centrosomes and it also anchors microtubules in non-centrosomal site. For example, in  
314 pillar cells (supporting cells) of the cochlea, ninein has a non-centrosomal location in adherens  
315 junctions, which serve as microtubule anchors (Mogensen et al., 2000, Moss et al., 2007).  
316 Notably, ninein distribution was no longer concentrated at the centrioles and became broader  
317 during centriole migration. This broaden ninein distribution during centriole migration suggests  
318 that microtubule organization is different during centriole migration and raises the possibility  
319 that ninein may function as microtubule anchors in addition to microtubule nucleation during  
320 centriole migration (Fig. 8).

321

### 322 **Relationship between DC and MC migration**

323 Many well described morphological and functional features distinguish between the MC and DC  
324 (Pelletier and Yamashita, 2012, Fujita et al., 2016). In addition to the function of DC maturing  
325 into an MC during the cell cycle, the function of the DC in differentiating cells is only beginning  
326 to be understood (Loukil et al., 2017, Betleja et al., 2018, Gottardo et al., 2015). Other than the  
327 DC being actively inhibited to form the cilium, recent results indicate that the proximity of the  
328 DC to the MC is also important for primary cilium formation (Loukil et al., 2017). Here, in  
329 nascent HCs, we show that when the MC was located at the center during Phase I, the DC was  
330 observed to move sporadically around the relatively stationary MC (Fig. 8). This phenomenon  
331 has been described in several vertebrate somatic cell lines (Piel et al., 2000). In these cell lines,  
332 the MC, which is associated with a microtubule network is stationary, whereas the DC, though  
333 associated with the microtubule nucleation marker,  $\gamma$ -tubulin, is more mobile. The functional  
334 significance of the mobile DC, however, remains unclear except that this behavior is regulated  
335 by the cell cycle and attenuates as cells transition from G1 to S phase.

336 During Phase II of the centriole migration, the DC invariably moved ahead of the MC to  
337 reach the peripheral destination. This pattern of the DC preceding the MC in migration was  
338 observed repeatedly in HCs under all conditions investigated such as during normal centriole  
339 migration, nocodazole treatments and recovery, and ectopic *Emx2* activation, suggesting that the  
340 migration of the DC is related to the MC. Although little is known about the relationships  
341 between the DC and MC in HCs, an inner ear conditional knockout of *Kif3a*, which encodes an  
342 intraflagellar transport protein, shows misplaced location and relationship between the MC and  
343 DC in cochlear HCs (Sipe and Lu, 2011).

344 Several scenarios could account for the observed behavior of the DC moving ahead of the  
345 MC in HCs. One possibility is that the two centrioles move independently of each other. Since  
346 each centriole is associated with a microtubule nucleation center as indicated by their association  
347 with  $\gamma$ -tubulin staining (Fig. 6B), each can be independently pulled by the microtubule-dynein  
348 system to their destinations in the peripheral cortex. The faster and higher mobility of the DC  
349 may simply be due to the MC being restricted by the attached cilium (Paintrand et al., 1992). An  
350 alternative scenario is that the MC is being dragged to the periphery by the DC via the  
351 intercentrosomal linkers between MC and DC, which are made of rootletin filaments (Yang et  
352 al., 2006). The sporadic movements of the DC around the MC in Phase I could also be regulated  
353 by the intercentrosomal linkers. In other systems, the length of these linkers can change and  
354 disintegrate based on maturation of the centrioles during the cell cycle (Bahmanyar et al., 2008,  
355 Mardin et al., 2010). However, little is known about the regulation and possible functions of  
356 these linkers in post-mitotic cells including HCs. Based on our findings, we speculate that the  
357 DC has an active role in guiding the MC/kinocilium to its proper location in differentiating HCs,  
358 in addition to its role in regulating ciliogenesis.

359

### 360 **The role of *Emx2* in reversing hair bundle orientation**

361 In zebrafish lateral line, *Emx2* regulates neuronal selectivity as well as hair bundle  
362 orientation (Ji et al., 2018). In the mouse utricle, onset of *Emx2* expression is well ahead of the  
363 emergence of HCs (Fig. S2d). Therefore, *Emx2* may have a role in regional patterning and/or  
364 HC fate specification that indirectly lead to hair bundle reversal. Our live-imaging results  
365 demonstrating that HCs are already pre-patterned by *Emx2* prior to centriole movements  
366 supports this hypothesis (Fig. 8). Nevertheless, our ectopic *Emx2* experiments using AAV  
367 indicate that tdTomato signal was detectable within 36 hrs of AAV-*Emx2* infection (Fig. 5).  
368 This timeframe of sequential transcriptional and translational events to yield detectable tdTomato  
369 signal is comparable to other mammalian systems. Under the assumption that *Emx2* is  
370 synthesized in a comparable time frame as tdTomato, hair bundle orientation reversal occurred  
371 relatively quickly within approximately 12 hours of detectable tdTomato. These results suggest  
372 that while *Emx2* may have other functions in the utricle, its bundle reversal effect is likely to be  
373 direct and does not require multiple cascades of transcriptional and translational events.  
374 Additionally, both the genetic and AAV viral approaches indicate that during these early phases

375 of centriole migration in hair bundle establishment, the system is plastic and responsive to Emx2  
376 (Fig. 8). However, the time-window of centrioles' responsiveness to Emx2 is critical as ectopic  
377 *Emx2* after E15.5 only has a limited effect on hair bundle reversal in naïve HCs (Jiang, Kindt &  
378 Wu 2017). This critical time-window may also attributed to the low frequency of hair bundle  
379 reversal observed in AAV-Emx2-tdT infected HCs (Fig. 4).

380 Furthermore, our results showed that the DC may have an active role in guiding the MC  
381 to its designated location in the HC periphery and a positive force is required to actively maintain  
382 this peripheral centriole positioning. These findings provided insights into the regulation of  
383 centriole dynamics during hair bundle establishment.

384

## 385 **Materials and methods**

### 386 **Mouse**

387 All animal experiments were conducted according to NIH guidelines and under the Animal Care  
388 Protocol of NIDCD/NIH (#1212-17). *GFP-Centrin2* mice were obtained from Xiaowei Lu at  
389 University of Virginia (PRID:MGI:3793421), *Atoh1-Cre* mice from Bernd Fritzscht at  
390 University of Iowa (PRID:MGI: 3775845), and *Gfi1-Cre* mice from Lin Gan at Augusta  
391 University (PRID:MGI:4430258; (Yang et al., 2010)). The *Rosa26R<sup>Emx2</sup>* mouse was generated by  
392 knocking in the cassette *attb-pCA promoter-lox-stop-lox-Emx2-T2A-Gfp-WPRE-polyA-attb* to  
393 the *Rosa* locus described previously (Jiang et al., 2017). *Rosa26R<sup>tdTomato</sup>* were purchased from  
394 Jackson laboratory (RRID:IMSR\_JAX:007914, (Madisen et al., 2010)). *Atoh1<sup>Cre</sup>; Rosa<sup>tdT/+</sup>*  
395 control specimens for live imaging was generated by crossing *Atoh1<sup>Cre</sup>; Rosa<sup>tdT/tdT</sup>* males with  
396 *GFP-Centrin2<sup>+/-</sup>* females. *Emx2* gain-of-function specimens was generated by crossing  
397 *Atoh1<sup>Cre</sup>; Rosa<sup>tdT/tdT</sup>* or *Gfi1<sup>Cre</sup>; Rosa<sup>tdT/tdT</sup>* males with *GFP-Centrin2<sup>+/-</sup>; Rosa<sup>Emx2/Emx2</sup>* females. In  
398 addition to tdTomato signals, HC identity in the live-images was confirmed based on the round  
399 or oval shape of the cuticular plate and its apical position of the nucleus within the epithelium  
400 relative to nuclei of the supporting cells.

401

### 402 **Live imaging**

403 The mouse utricle together with anterior and lateral cristae for orientation were dissected from  
404 E13.5 mouse inner ears. The harvested tissue was mounted on Cell-Tak (Corning, NY, NY)-  
405 coated coverslips (Belyantseva, 2016) in DMEM/F12 (Thermo Fisher Scientific, Waltham, MA)  
406 in a DMEM/F12 medium containing 10% of fetal bovine serum (FBS, Thermo Fisher Scientific,  
407 Waltham, MA) and 50 U/ml penicillin G (Sigma-Aldrich, St Louis, MO) unless indicated  
408 otherwise. Live imaging was started 4 hrs after incubating the explant attached fully to the  
409 coverslip in the tissue culture incubator. The imaging was conducted in a chamber maintained at  
410 37°C and 5% CO<sub>2</sub> on either an inverted PerkinElmer UltraVIEW Time Lapse Image Analysis  
411 System with an CMOS camera or a Nikon A1R HD confocal system on an Ni-E upright  
412 microscope with a GaAsP detector. For UltraVIEW, a 10x objective was used for the lower  
413 magnification images, and a 63x objective was used for time-lapse imaging (pixel size is 0.216 x  
414 0.216 μm). For Nikon A1R, 25x objectives were used for both the low (pixel sizes are 0.48 x  
415 0.48) and high magnification (pixel sizes 0.16 x 0.16 μm) time lapse recordings. In both



416 settings, Z-stacks of 30-60  $\mu\text{m}$  thickness with a 0.5  $\mu\text{m}$  step were taken at each time frame with  
417 10 minute-interval between frames. Live imaging was conducted up to 41 hours.

418 For the microtubule inhibition experiments, we first determined the dose of nocodazole  
419 (Sigma-Aldrich, St Louis, MO) to use. Two doses of nocodazole, 5  $\mu\text{M}$  and 33  $\mu\text{M}$ , which had  
420 been used in cochlear explants studies (Szarama et al., 2012, Shi et al., 2005) were tested on  
421 E13.5 utricular explants for 24 hrs. While explants treated with 5  $\mu\text{M}$  nocodazole showed  
422 largely intact HCs with reduced tubulin signals from the cytoplasm, the utricle explants treated  
423 with 33  $\mu\text{M}$  nocodazole showed reduced number of HCs, which looked unhealthy or apoptotic.  
424 Therefore, the dose of 5  $\mu\text{M}$  was used for live imaging studies. Nocodazole in DMEM/F12 with  
425 10% FBS or media for washing out was added to the utricular explants directly without  
426 disturbing the position of the explant under the microscope.

427

#### 428 **AAV virus**

429 The AAV2.7m8-CAG-Emx2-P2A-tdTomato ( $2.2 \times 10^{12}$  genome copies/ml (GC/ml)) and  
430 AAV2.7m8-CAG-tdTomato ( $5.4 \times 10^{12}$  GC/ml) were synthesized by Vector Biolabs, Inc. The  
431 expression of *Emx2* and *tdTomato* were driven by the CAG promoter. Four hrs after dissection,  
432 AAV was added to the E13.5 utricular explants to achieve the concentration of  $4.0 \times 10^{10}$  GC in  
433 100  $\mu\text{l}$  of culture medium containing DMEM/F12 with 2 % of FBS and 50 U/ml penicillin G.  
434 One hour later, 100  $\mu\text{l}$  culture medium was added to the culture and after overnight incubation,  
435 the culture was washed several times before changing to DMEM/F12 containing 10 % FBS and  
436 50 U/ml penicillin G.

437

#### 438 **Whole mount immunostaining**

439 Dissected utricles were attached to the Cell-Tak coated coverslip and then fixed with 4%  
440 paraformaldehyde in PBS at room temperature for 15 minutes. After fixation, the tissue attached  
441 to the coverslip was washed three times in PBS before blocking with PBS containing 5% donkey  
442 serum and 0.3% Triton-X for 45 minutes. For primary antibody, mouse anti- $\beta$ II spectrin (1:500;  
443 BD Biosciences, San Jose, CA), rabbit anti-Arl13b (1:500; Proteintech, Rosemont, IL), mouse  
444 anti-acetylated tubulin (1:500; Sigma-Aldrich, St Louis, MO), rabbit anti-ninein, (1:500; Abcam,  
445 Cambridge,UK) or rabbit anti- $\gamma$ -tubulin (1:500; Sigma-Aldrich, St Louis, MO) was used for  
446 overnight incubation at 4°C. Secondary antibodies of either Alexa Fluor 488/647 donkey anti-

447 mouse IgG (Thermo Fisher Scientific, Waltham, MA) or Alexa Fluor donkey anti-rabbit 405/647  
448 (Thermo Fisher Scientific, Waltham, MA) was used at 1:500 dilution for 15 minutes at room  
449 temperature. After extensive washing with PBS, samples were mounted in ProLong Gold  
450 Antifade (Thermo Fisher Scientific, Waltham, MA).

451 SiR-tubulin (Spirochrome, Switzerland) was added to the live utricular samples attached  
452 on the coverslip to achieve a final concentration of 1  $\mu$ M in the culture medium containing 10%  
453 FBS in DMEM/F12 and incubated for 10 hours before imaging. For imaging of  $\gamma$ -tubulin,  
454 acetylated-tubulin, and ninein staining as well as SiR-tubulin, Airyscan imaging was conducted  
455 on a Zeiss LSM 780 with an Airyscan attachment (Carl Zeiss AG, Oberkochen, Germany) using  
456 a 63 x 1.4 NA oil objective lens. The acquired images were processed by Zeiss Zen Black  
457 software v2.1 for deconvolution.

458

#### 459 **In situ hybridization**

460 In situ hybridization was conducted as described previously (Morsli et al., 1998). Digoxin-  
461 labeled RNA probes were synthesized for Sox2 (Evsen et al., 2013) and Emx2 (Simeone et al.,  
462 1992) as described.

463

#### 464 **Analysis**

465 To correct for sample drifting during imaging over time, the 3-D time-lapse image was processed  
466 using ImageJ (Schneider et al., 2012) and the plugin of PoorMan3DReg  
467 (<http://sybil.ece.ucsb.edu/pages/software.html>) to re-align HCs to the stabilized x-y positions  
468 after semi-automatic adjustment of the z-positions by ImageJ macro (provided by Dr. Sho Ota),  
469 manual z-stack regulator. In some utricular images, GFP signals in tdTomato-labeled HCs were  
470 segmented by using the ImageJ macro (provided by Dr. Sho Ota), Centrin-detector, that is  
471 capable of isolating GFP signals overlapping with tdTomato expression in HCs depending on  
472 signal thresholding. The processed images were used for subsequent analyses. For tracking of  
473 centrioles and determination of HC apical center, we performed spot and cell tracking algorithm  
474 based on Imaris 9.5.0 (Bitplane, Zurich, Switzerland) and these tracking data were used to  
475 generate the 3D reconstructed videos.

476 The entry of centriole movements into Phase II was determined retroactively when the  
477 DC is consistently moving towards the peripheral direction where hair bundles should be

478 established. The tdTomato expression level was calculated by the relative fluorescent intensities  
479 of the tdTomato in HCs subtracted from those of surrounding supporting cells without tdTomato  
480 expression. The distance between both centrioles were measured on the coordinate of the  
481 tracking data, and the average distances of both centrioles were calculated from all the time  
482 points during each of the phases in individual cells. For the migration speed, the difference of  
483 coordinates of each centriole compared to the center of the HC in one frame (10 min) was  
484 measured, and the average speed of each centriole was calculated from all the time points after  
485 HC center was determined. For statistics, students t-test was used with p-values of less than  
486 0.5%, 0.1% and 0.01% indicated by \*, \*\* and \*\*\*, respectively.

487  
488  
489

#### 490 **Acknowledgements**

491 We thank Dr. Sho Ota for writing the Fiji macro and providing helpful advice on live imaging  
492 data analyses, Kevin Isgrig and Dr. Wade Chen at NIDCD for advice on AAV2.7m8 virus and  
493 Dr. Elizabeth Driver at NIDCD for her help with live imaging. We are also grateful to Drs.  
494 Brian Galletta, Matt Hannaford and Nasser Rusan at National Heart Lung and Blood Institute  
495 and Drs. Elizabeth Driver, Inna Belyantseva and Ronald Petralia at NIDCD, and members of the  
496 Wu Lab for their critical review of the manuscript. We also want to thank Michael Mulheisen  
497 for technical support in conducting the in situ hybridization experiments.

498  
499

#### 500 **Competing interests**

501 The authors declare no competing or financial interests.

502

#### 503 **Funding**

504 This work was funded by Intramural Research Program grant (#1ZIADC000021)

505

506

#### 507 **References**

508 BAHMANYAR, S., KAPLAN, D. D., DELUCA, J. G., GIDDINGS, T. H., JR., O'TOOLE, E. T., WINEY, M.,  
509 SALMON, E. D., CASEY, P. J., NELSON, W. J. & BARTH, A. I. 2008. beta-Catenin is a Nek2  
510 substrate involved in centrosome separation. *Genes Dev*, 22, 91-105.

- 511 BELYANTSEVA, I. A. 2016. Helios((R)) Gene Gun-Mediated Transfection of the Inner Ear Sensory  
512 Epithelium: Recent Updates. *Methods Mol Biol*, 1427, 3-26.
- 513 BERMINGHAM, N. A., HASSAN, B. A., PRICE, S. D., VOLLRATH, M. A., BEN-ARIE, N., EATOCK, R.  
514 A., BELLEN, H. J., LYSAKOWSKI, A. & ZOGHBI, H. Y. 1999. Math1: an essential gene for  
515 the generation of inner ear hair cells. *Science*, 284, 1837-41.
- 516 BETLEJA, E., NANJUNDAPPA, R., CHENG, T. & MAHJOUR, M. R. 2018. A novel Cep120-dependent  
517 mechanism inhibits centriole maturation in quiescent cells. *Elife*, 7.
- 518 COTANCHE, D. A. & CORWIN, J. T. 1991. Stereociliary bundles reorient during hair cell  
519 development and regeneration in the chick cochlea. *Hear Res*, 52, 379-402.
- 520 DABDOUB, A., DONOHUE, M. J., BRENNAN, A., WOLF, V., MONTCOUQUIOL, M., SASSOON, D.  
521 A., HSEIH, J. C., RUBIN, J. S., SALINAS, P. C. & KELLEY, M. W. 2003. Wnt signaling  
522 mediates reorientation of outer hair cell stereociliary bundles in the mammalian  
523 cochlea. *Development*, 130, 2375-84.
- 524 DEANS, M. R., ANTIC, D., SUYAMA, K., SCOTT, M. P., AXELROD, J. D. & GOODRICH, L. V. 2007.  
525 Asymmetric distribution of prickle-like 2 reveals an early underlying polarization of  
526 vestibular sensory epithelia in the inner ear. *J Neurosci*, 27, 3139-47.
- 527 DELGEHYR, N., SILLIBOURNE, J. & BORNENS, M. 2005. Microtubule nucleation and anchoring at  
528 the centrosome are independent processes linked by ninein function. *J Cell Sci*, 118,  
529 1565-75.
- 530 DENMAN-JOHNSON, K. & FORGE, A. 1999. Establishment of hair bundle polarity and orientation  
531 in the developing vestibular system of the mouse. *J Neurocytol*, 28, 821-35.
- 532 EVSEN, L., SUGAHARA, S., UCHIKAWA, M., KONDOH, H. & WU, D. K. 2013. Progression of  
533 neurogenesis in the inner ear requires inhibition of Sox2 transcription by neurogenin1  
534 and neurod1. *J Neurosci*, 33, 3879-90.
- 535 EZAN, J., LASVAUX, L., GEZER, A., NOVAKOVIC, A., MAY-SIMERA, H., BELOTTI, E., LHOUMEAU, A.  
536 C., BIRNBAUMER, L., BEER-HAMMER, S., BORG, J. P., LE BIVIC, A., NÜRNBERG, B., SANS,  
537 N. & MONTCOUQUIOL, M. 2013. Primary cilium migration depends on G-protein  
538 signalling control of subapical cytoskeleton. *Nat Cell Biol*, 15, 1107-15.
- 539 FLOCK, A. 1964. Structure of the macula utriculi with special reference to directional interplay  
540 of sensory responses as revealed by morphological polarization. *J Cell Biol*, 22, 413-31.
- 541 FUJITA, H., YOSHINO, Y. & CHIBA, N. 2016. Regulation of the centrosome cycle. *Mol Cell Oncol*,  
542 3, e1075643.
- 543 GOODRICH, L. V. & STRUTT, D. 2011. Principles of planar polarity in animal development.  
544 *Development*, 138, 1877-92.
- 545 GOTTARDO, M., POLLAROLO, G., LLAMAZARES, S., REINA, J., RIPARBELLI, M. G., CALLAINI, G. &  
546 GONZALEZ, C. 2015. Loss of Centrobin Enables Daughter Centrioles to Form Sensory Cilia  
547 in Drosophila. *Curr Biol*, 25, 2319-24.
- 548 HOEBEKE, J., VAN NIJEN, G. & DE BRABANDER, M. 1976. Interaction of oncodazole (R 17934), a  
549 new antitumoral drug, with rat brain tubulin. *Biochem Biophys Res Commun*, 69, 319-24.
- 550 HOLLEY, M., RHODES, C., KNEEBONE, A., HERDE, M. K., FLEMING, M. & STEEL, K. P. 2010. Emx2  
551 and early hair cell development in the mouse inner ear. *Dev Biol*, 340, 547-56.
- 552 ISGRIG, K., MCDUGALD, D. S., ZHU, J., WANG, H. J., BENNETT, J. & CHIEN, W. W. 2019.  
553 AAV2.7m8 is a powerful viral vector for inner ear gene therapy. *Nat Commun*, 10, 427.

- 554 JI, Y. R., WARRIER, S., JIANG, T., WU, D. K. & KINDT, K. S. 2018. Directional selectivity of afferent  
555 neurons in zebrafish neuromasts is regulated by Emx2 in presynaptic hair cells. *Elife*, 7.
- 556 JIANG, T., KINDT, K. & WU, D. K. 2017. Transcription factor Emx2 controls stereociliary bundle  
557 orientation of sensory hair cells. *Elife*, 6.
- 558 JONES, C., QIAN, D., KIM, S. M., LI, S., REN, D., KNAPP, L., SPRINZAK, D., AVRAHAM, K. B.,  
559 MATSUZAKI, F., CHI, F. & CHEN, P. 2014. Ankrd6 is a mammalian functional homolog of  
560 *Drosophila* planar cell polarity gene *diego* and regulates coordinated cellular orientation  
561 in the mouse inner ear. *Dev Biol*, 395, 62-72.
- 562 LEE, J., ANDREEVA, A., SIPE, C. W., LIU, L., CHENG, A. & LU, X. 2012. PTK7 regulates myosin II  
563 activity to orient planar polarity in the mammalian auditory epithelium. *Curr Biol*, 22,  
564 956-66.
- 565 LOUKIL, A., TORMANEN, K. & SUTTERLIN, C. 2017. The daughter centriole controls ciliogenesis  
566 by regulating Neurl-4 localization at the centrosome. *J Cell Biol*, 216, 1287-1300.
- 567 LU, X. & SIPE, C. W. 2016. Developmental regulation of planar cell polarity and hair-bundle  
568 morphogenesis in auditory hair cells: lessons from human and mouse genetics. *Wiley*  
569 *Interdiscip Rev Dev Biol*, 5, 85-101.
- 570 MADISEN, L., ZWINGMAN, T. A., SUNKIN, S. M., OH, S. W., ZARIWALA, H. A., GU, H., NG, L. L.,  
571 PALMITER, R. D., HAWRYLYCZ, M. J., JONES, A. R., LEIN, E. S. & ZENG, H. 2010. A robust  
572 and high-throughput Cre reporting and characterization system for the whole mouse  
573 brain. *Nat Neurosci*, 13, 133-40.
- 574 MARDIN, B. R., LANGE, C., BAXTER, J. E., HARDY, T., SCHOLZ, S. R., FRY, A. M. & SCHIEBEL, E.  
575 2010. Components of the Hippo pathway cooperate with Nek2 kinase to regulate  
576 centrosome disjunction. *Nat Cell Biol*, 12, 1166-76.
- 577 MIYAMOTO, N., YOSHIDA, M., KURATANI, S., MATSUO, I. & AIZAWA, S. 1997. Defects of  
578 urogenital development in mice lacking Emx2. *Development*, 124, 1653-64.
- 579 MOGENSEN, M. M., MALIK, A., PIEL, M., BOUCKSON-CASTAING, V. & BORNENS, M. 2000.  
580 Microtubule minus-end anchorage at centrosomal and non-centrosomal sites: the role  
581 of ninein. *J Cell Sci*, 113 ( Pt 17), 3013-23.
- 582 MONTCOUQUIOL, M., RACHEL, R. A., LANFORD, P. J., COPELAND, N. G., JENKINS, N. A. &  
583 KELLEY, M. W. 2003. Identification of Vangl2 and Scrb1 as planar polarity genes in  
584 mammals. *Nature*, 423, 173-7.
- 585 MONTCOUQUIOL, M., SANS, N., HUSS, D., KACH, J., DICKMAN, J. D., FORGE, A., RACHEL, R. A.,  
586 COPELAND, N. G., JENKINS, N. A., BOGANI, D., MURDOCH, J., WARCHOL, M. E.,  
587 WENTHOLD, R. J. & KELLEY, M. W. 2006. Asymmetric localization of Vangl2 and Fz3  
588 indicate novel mechanisms for planar cell polarity in mammals. *J Neurosci*, 26, 5265-75.
- 589 MORSLI, H., CHOO, D., RYAN, A., JOHNSON, R. & WU, D. K. 1998. Development of the mouse  
590 inner ear and origin of its sensory organs. *J Neurosci*, 18, 3327-35.
- 591 MOSS, D. K., BELLETT, G., CARTER, J. M., LIOVIC, M., KEYNTON, J., PRESCOTT, A. R., LANE, E. B. &  
592 MOGENSEN, M. M. 2007. Ninein is released from the centrosome and moves bi-  
593 directionally along microtubules. *J Cell Sci*, 120, 3064-74.
- 594 PAINTRAND, M., MOUDJOU, M., DELACROIX, H. & BORNENS, M. 1992. Centrosome  
595 organization and centriole architecture: their sensitivity to divalent cations. *J Struct Biol*,  
596 108, 107-28.

- 597 PELLEGRINI, M., MANSOURI, A., SIMEONE, A., BONCINELLI, E. & GRUSS, P. 1996. Dentate gyrus  
598 formation requires *Emx2*. *Development*, 122, 3893-8.
- 599 PELLETIER, L. & YAMASHITA, Y. M. 2012. Centrosome asymmetry and inheritance during animal  
600 development. *Curr Opin Cell Biol*, 24, 541-6.
- 601 PIEL, M., MEYER, P., KHODJAKOV, A., RIEDER, C. L. & BORNENS, M. 2000. The respective  
602 contributions of the mother and daughter centrioles to centrosome activity and  
603 behavior in vertebrate cells. *J Cell Biol*, 149, 317-30.
- 604 SCHNEIDER, C. A., RASBAND, W. S. & ELICEIRI, K. W. 2012. NIH Image to ImageJ: 25 years of  
605 image analysis. *Nat Methods*, 9, 671-5.
- 606 SHI, X., GILLESPIE, P. G. & NUTTALL, A. L. 2005. Na<sup>+</sup> influx triggers bleb formation on inner hair  
607 cells. *Am J Physiol Cell Physiol*, 288, C1332-41.
- 608 SHOTWELL, S. L., JACOBS, R. & HUDSPETH, A. J. 1981. Directional sensitivity of individual  
609 vertebrate hair cells to controlled deflection of their hair bundles. *Ann N Y Acad Sci*, 374,  
610 1-10.
- 611 SIMEONE, A., GULISANO, M., ACAMPORA, D., STORNAIUOLO, A., RAMBALDI, M. & BONCINELLI,  
612 E. 1992. Two vertebrate homeobox genes related to the *Drosophila* empty spiracles  
613 gene are expressed in the embryonic cerebral cortex. *Embo j*, 11, 2541-50.
- 614 SIPE, C. W. & LU, X. 2011. Kif3a regulates planar polarization of auditory hair cells through both  
615 ciliary and non-ciliary mechanisms. *Development*, 138, 3441-9.
- 616 SZARAMA, K. B., GAVARA, N., PETRALIA, R. S., KELLEY, M. W. & CHADWICK, R. S. 2012.  
617 Cytoskeletal changes in actin and microtubules underlie the developing surface  
618 mechanical properties of sensory and supporting cells in the mouse cochlea.  
619 *Development*, 139, 2187-97.
- 620 TARCHINI, B., JOLICOEUR, C. & CAYOUEUETTE, M. 2013. A molecular blueprint at the apical surface  
621 establishes planar asymmetry in cochlear hair cells. *Dev Cell*, 27, 88-102.
- 622 TARCHINI, B. & LU, X. 2019. New insights into regulation and function of planar polarity in the  
623 inner ear. *Neurosci Lett*, 709, 134373.
- 624 TARCHINI, B., TADENEV, A. L., DEVANNEY, N. & CAYOUEUETTE, M. 2016. A link between planar  
625 polarity and staircase-like bundle architecture in hair cells. *Development*, 143, 3926-  
626 3932.
- 627 TILNEY, L. G., TILNEY, M. S. & DEROSIER, D. J. 1992. Actin filaments, stereocilia, and hair cells:  
628 how cells count and measure. *Annu Rev Cell Biol*, 8, 257-74.
- 629 WALLIS, D., HAMBLIN, M., ZHOU, Y., VENKEN, K. J., SCHUMACHER, A., GRIMES, H. L., ZOGHBI,  
630 H. Y., ORKIN, S. H. & BELLEN, H. J. 2003. The zinc finger transcription factor *Gfi1*,  
631 implicated in lymphomagenesis, is required for inner ear hair cell differentiation and  
632 survival. *Development*, 130, 221-32.
- 633 YANG, H., GAN, J., XIE, X., DENG, M., FENG, L., CHEN, X., GAO, Z. & GAN, L. 2010. *Gfi1*-Cre  
634 knock-in mouse line: A tool for inner ear hair cell-specific gene deletion. *Genesis*, 48,  
635 400-6.
- 636 YANG, J., ADAMIAN, M. & LI, T. 2006. Rootletin interacts with C-Nap1 and may function as a  
637 physical linker between the pair of centrioles/basal bodies in cells. *Mol Biol Cell*, 17,  
638 1033-40.

- 639 YANG, X., QIAN, X., MA, R., WANG, X., YANG, J., LUO, W., CHEN, P., CHI, F. & REN, D. 2017.  
640 Establishment of planar cell polarity is coupled to regional cell cycle exit and cell  
641 differentiation in the mouse utricle. *Sci Rep*, 7, 43021.  
642 ZHENG, J. L. & GAO, W. Q. 2000. Overexpression of Math1 induces robust production of extra  
643 hair cells in postnatal rat inner ears. *Nat Neurosci*, 3, 580-6.  
644

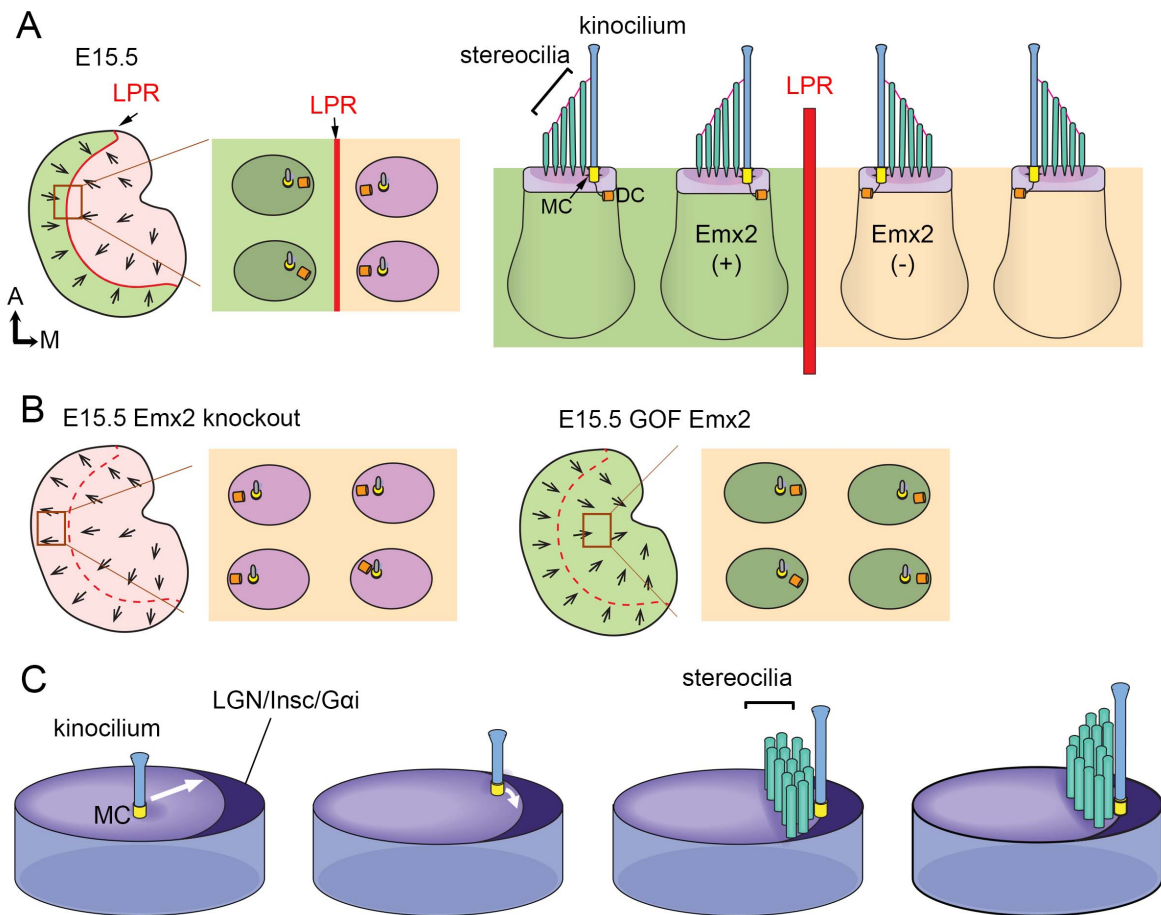

645  
646  
647  
648  
649  
650  
651  
652  
653  
654

**Figure 1. Hair bundle orientation establishment in the developing mouse utricle.** (A) In E15.5 utricle, hair bundles are pointing towards each other (arrows) across the line of polarity reversal (LPR, red). The kinocilium is located asymmetrically at the lateral region of the apical HC surface. The MC (yellow), which forms the basal body of the kinocilium, is located more centrally relative to the DC (orange). *Emx2*-positive domain is in green. (B) Schematics showing hair bundle orientation in *Emx2* knockout and Gain-of-Function utricles. (C) Model showing asymmetric hair bundle establishment requires the LGN/Inscuteable/Gai complex. Orientations: A, anterior; M, medial.



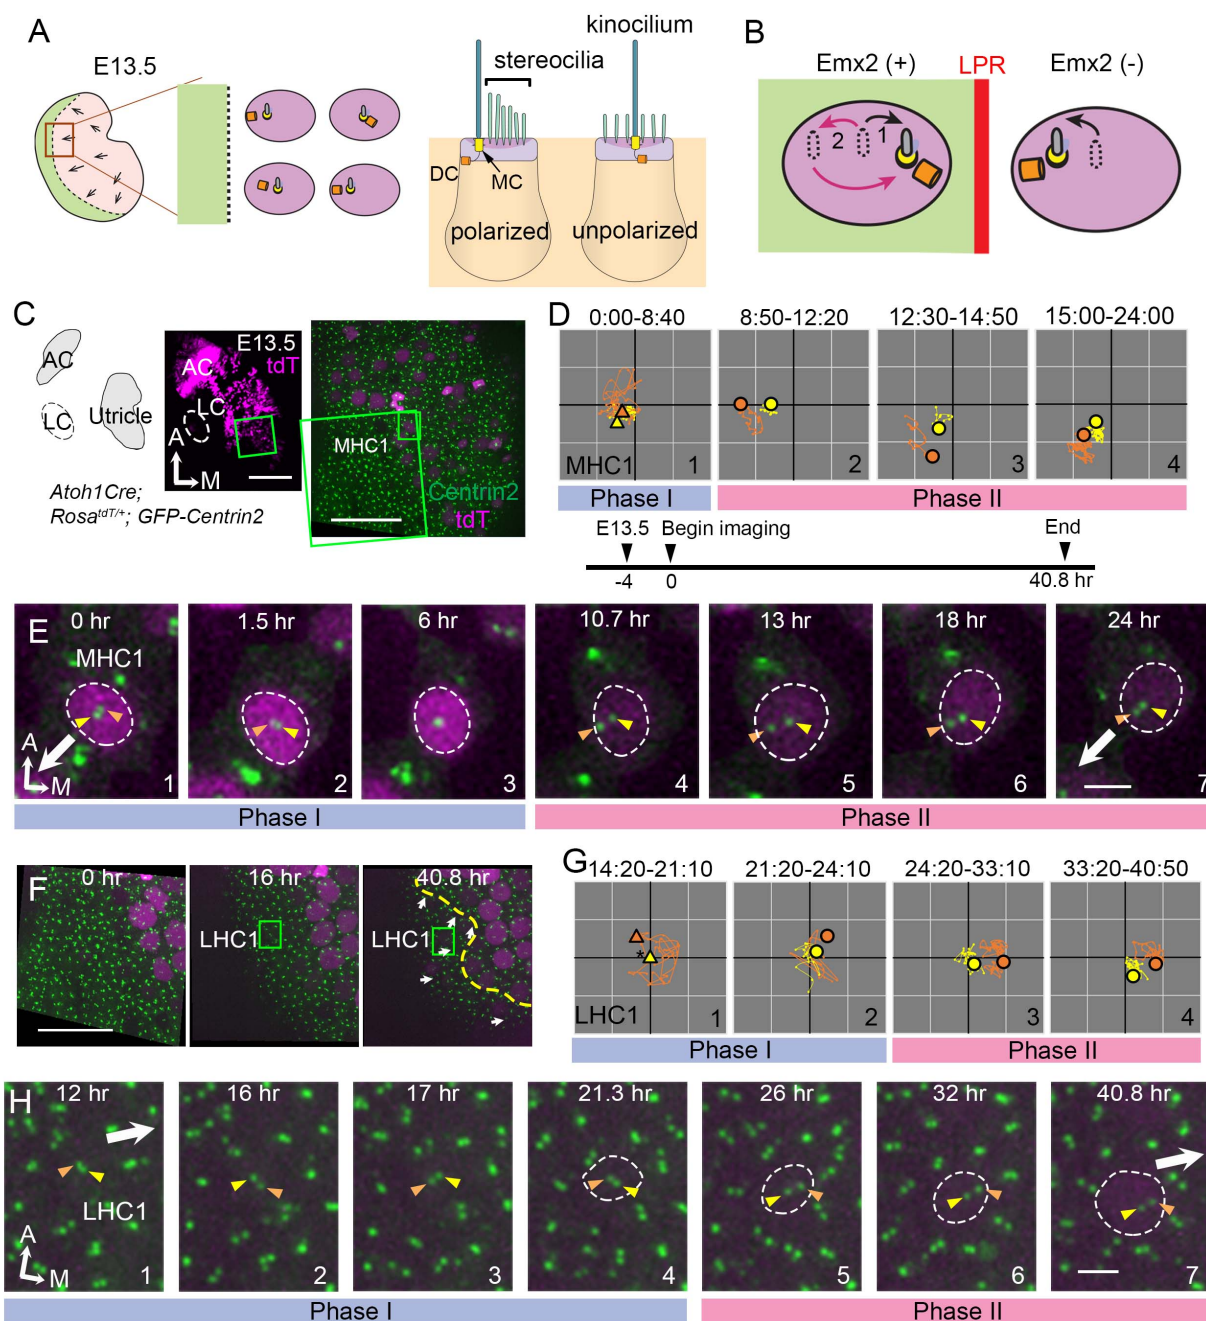

655  
 656 **Figure 2. Live imaging of hair bundle establishment in MHC and LHCs based on centriole**  
 657 **movements.** (A) Utricle schematic at E13.5. The LPR (dotted line) is not apparent since HCs  
 658 are mostly absent in the *Emx2*-positive lateral region (green). In the medial utricle, while some  
 659 HCs are polarized showing the kinocilium located asymmetrically at the lateral region, others are  
 660 immature and unpolarized with the kinocilium located at the center. (B) In LHCs,  
 661 MC/kinocilium could migrate directly towards the medial side (black arrow, #1) or it could first  
 662 migrate toward the lateral side before reversing its direction to the medial side (red arrows, #2).  
 663 (C) Schematic drawing and images of an *Atoh1*<sup>Cre</sup>; *Rosa*<sup>tdT/+</sup>; *GFP-Centrin2* utricular explant at  
 664 E13.5 showing locations of MHC1 (small rectangle). (D, E) Centriole trajectories (D) and  
 665 selected time frames of apical views (E) of MC (yellow) and DC (orange) in MHC1 from time-

666 lapse recording. (D) Yellow and orange triangles represent the beginning positions of respective  
667 MC and DC in each time period, and the circled dots represent the final positions in each time  
668 period. The yellow and orange lines represent trajectories of the respective MC and DC and are  
669 plotted relative to the center of the HC, which is represented by the centroid of the graph. Each  
670 small grid is 1.25 x 1.25  $\mu\text{m}$ . All subsequent live-imaging graphs are organized in a similar  
671 manner. Initially, the DC is moving vigorously around the MC (Phase I), then the DC starts to  
672 move towards the periphery, which is followed by the MC (Phase II). (E) In Phase I (blue bar),  
673 the basal body/MC (yellow arrowhead) is located at the center of the HC, whereas the DC  
674 (orange arrowhead) moves around the MC. In Phase II (pink bar), the DC starts to migrate  
675 towards the lateral periphery of the HC, where the hair bundles should be established in this  
676 region of the utricle (white arrow). This migration is followed by the MC. (F-H) LHC1. (F)  
677 Selected time frames of the large rectangle area in (C) at the beginning (0:00), middle (16:00)  
678 and final frame (40:50) of the recording showing the appearance of LHC1. (G, H) Centriole  
679 trajectories (F) and selected time frames of the MC and DC (H) in LHC1. (G,H) tdTomato  
680 signal in LHC1 not detectable until 21 hrs into the recording (F, H#1-3) made it difficult to  
681 identify the center of the HC. Therefore the position of the MC (yellow triangle) was used as a  
682 proxy for the center of the HC (asterisk) for #1 in (G) until the center of HC can be determined in  
683 #2-4 in (G). LHC1 shows similar centriole movements as MHC1. Abbreviations: AC, anterior  
684 crista; LC, lateral crista; MHC, medial utricular HC; LHC, lateral utricular HC. Scale bars: 100  
685  $\mu\text{m}$  (low mag) and 30  $\mu\text{m}$  (high mag) in (C), 30  $\mu\text{m}$  in (F), 3  $\mu\text{m}$  in (E) and (H).  
686

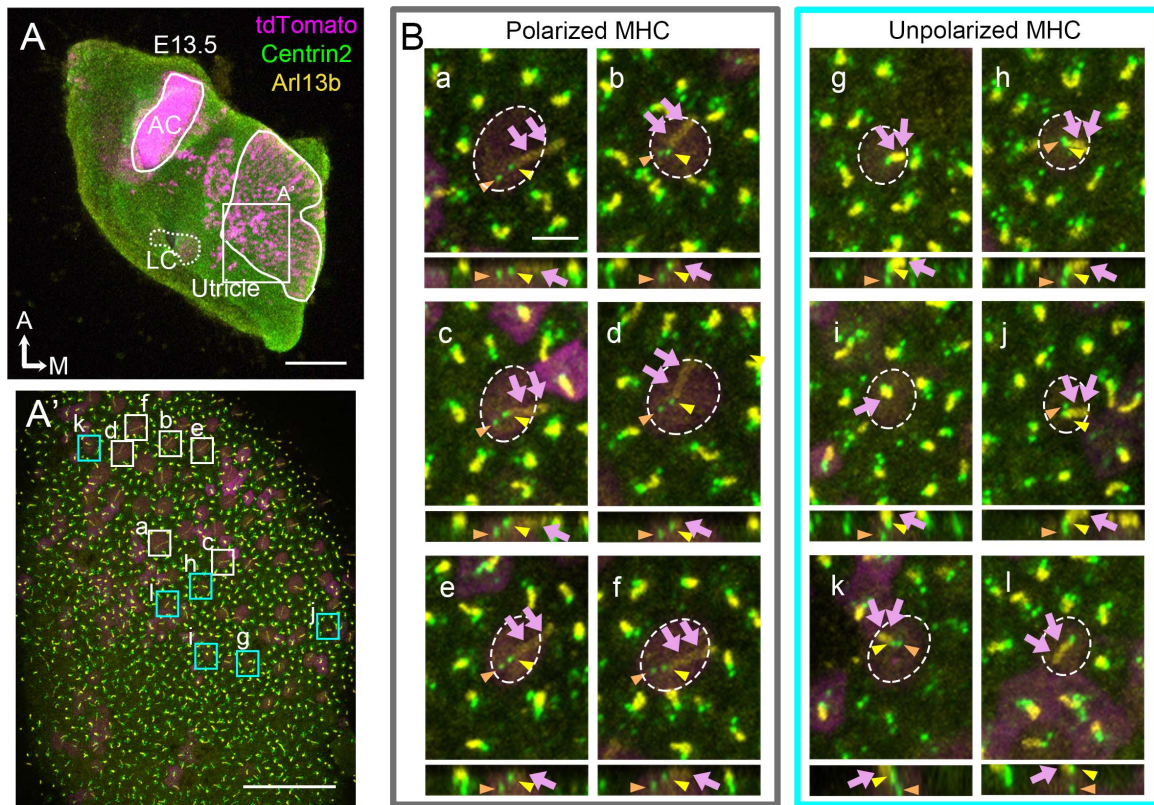

687  
688 **Figure Supplement 2a. Identification of mother and daughter centrioles in polarized and**  
689 **unpolarized MHCs.** (A,A') A low (A) and high (A') magnification of *Atoh1<sup>Cre</sup>; Rosa<sup>tdT/+</sup>; GFP-Centrin2*  
690 utricular explant that was immuno-stained with anti-Arl13b antibodies (yellow) at  
691 E13.5. (B) Representative apical and side views of polarized (a-f) and unpolarized (g-l) HCs in  
692 (A') From apical views (upper panels), the MC (yellow arrowhead) is associated with the  
693 Arl13b-positive kinocilium (magenta arrows) and not the DC (orange arrowhead) in both  
694 polarized and unpolarized HCs. From side views (lower panels), the MC is positioned closer to  
695 the apical surface of the HC than the DC. Notably, the DC position is consistently more lateral  
696 than the MC in polarized HCs (a-f) but its position relative to the MC is variable in unpolarized  
697 HCs (g-l). Scale bars: 100  $\mu$ m in (A), 30  $\mu$ m in (A') and 3  $\mu$ m in (a), which applies to (b-l).

698  
699  
700  
701

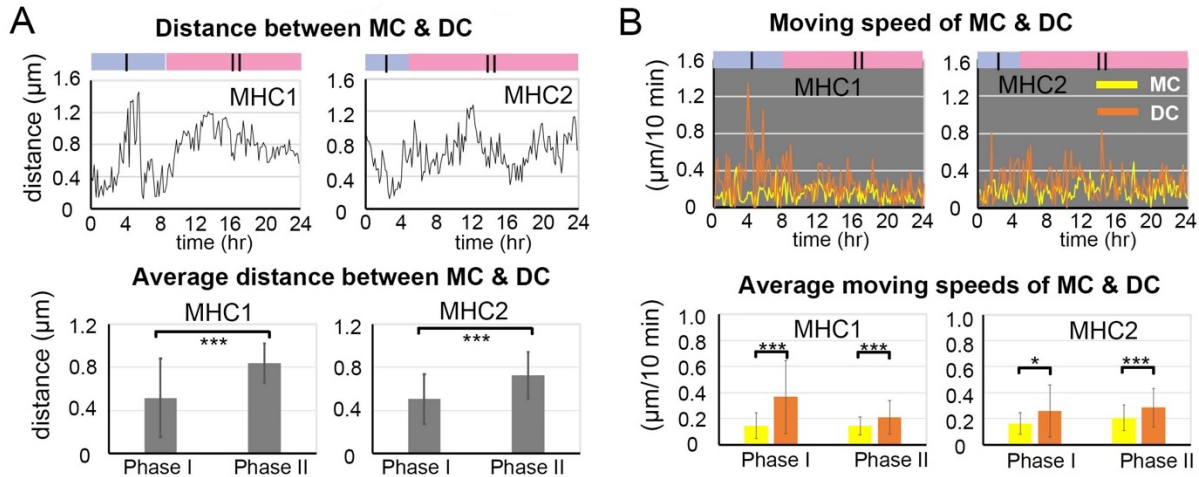

702  
703  
704  
705  
706  
707  
708  
709  
710

**Figure Supplement 2b. Traveled distance and speed between the MC and DC in MHCs.**

(A) The distance traveled between MC and DC over time and their average distances in the two phases. MHC1: number of time points measured equal (n) 53 and 92 for Phase I and II, MHC2: n=30 and 115 for Phase I and II. (B) Distance traveled by the MC and DC per a 10-min time frame and their average speed in the two phases. MHC1: number of speeds measured (n) equal 52 and 91 for Phase I and II, MHC2: n=29 and 114 for Phase I and II. Error bars represent standard deviation, SD. \* $p<0.05$ , \*\*\*  $P<0.001$

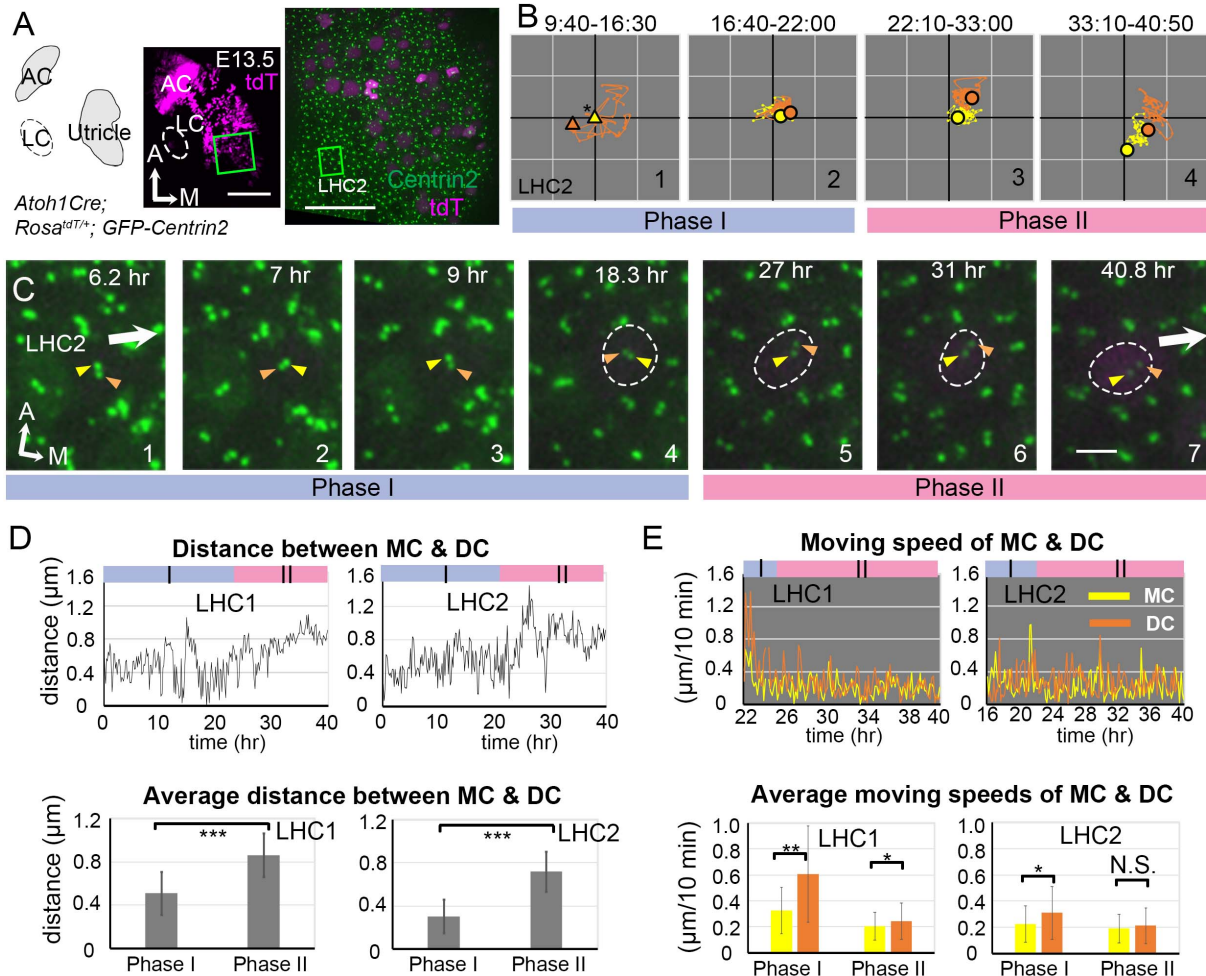

711  
 712 **Figure Supplement 2c. Live imaging of hair bundle establishment in LHCs based on**  
 713 **centriole movements.** (A) Schematic drawing and images of an *Atoh1<sup>Cre</sup>; Rosa<sup>tdT/+</sup>; GFP-*  
 714 *Centrin2* utricular explant at E13.5. (B) The trajectory of the MC (yellow triangle) is used as a proxy for the center of the HC (asterisk) for #1,  
 715 because of the weak tdTomato signal. For #2-4, the center of the graph represents the apical  
 716 center of the HC, as described in Fig. 2. The DC (orange) initially shows rapid movements  
 717 around the MC in Phase I (#1-2). Then, the DC (orange) starts to move medially, which is  
 718 followed by the MC in Phase II (#3-4). (C) Selected frames from a time-lapse recording of  
 719 centriole movements showing apical views of LHC2. In Phase I (#1-4), the DC moves around  
 720 the MC, when tdTomato signal is not apparent. At the end of Phase I (#4), the tdTomato signal  
 721 is detectable and it continues to increase in Phase II. During Phase II (#5-7), the DC starts to  
 722 migrate towards the medial periphery of the HC, which is followed by the MC. (D) The distance  
 723 between MC and DC over time and their average distances in each phase. LHC1: number of  
 724 time points measured (n) equal 146 and 100 for Phase I and II, LHC2: n=133 and 113 for Phase I  
 725 and II. (E) The moving speed of MC and DC in each 10-min time frame and their averages in  
 726 each phase. LHC1: number of speeds measured (n) equal 18 and 99 for Phase I and II, LHC2:  
 727 n=34 and 112 for Phase I and II. Error bars represent SD in (D) and (E). \*  $P < 0.05$ , \*\*  $P < 0.01$ ,  
 728 \*\*\*  $P < 0.001$ .  
 729  
 730

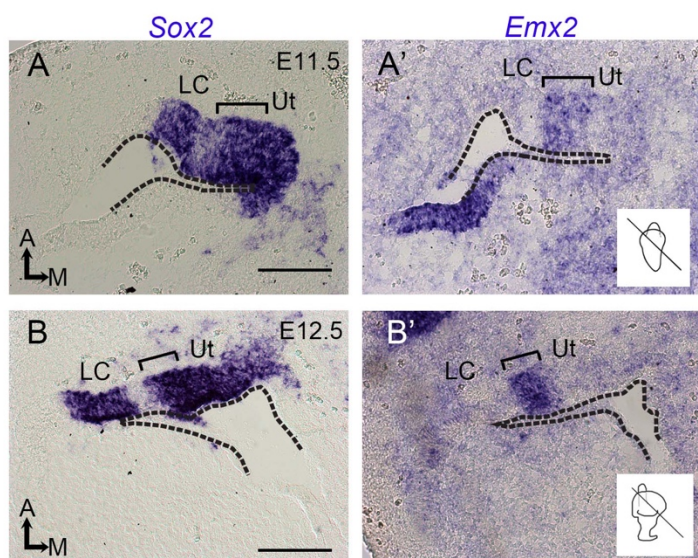

731  
732 **Figure Supplement 2d. Expression of *Emx2* in the developing utricle.** (A, A', B, B') In situ  
733 hybridization of adjacent sections at the levels of the utricle (Ut) and lateral crista (LC) at E11.5  
734 (A, A') and E12.5 (B, B'). The levels of sections are indicated in the inner ear schematics.  
735 Sensory tissues of the lateral crista and utricle are *Sox2*-positive, and the bracket indicates the  
736 lateral sensory region of the utricle that also expresses *Emx2*. Dotted lines indicate the apical  
737 margin of the otic epithelium. Scale bars: 50  $\mu$ m.  
738

739

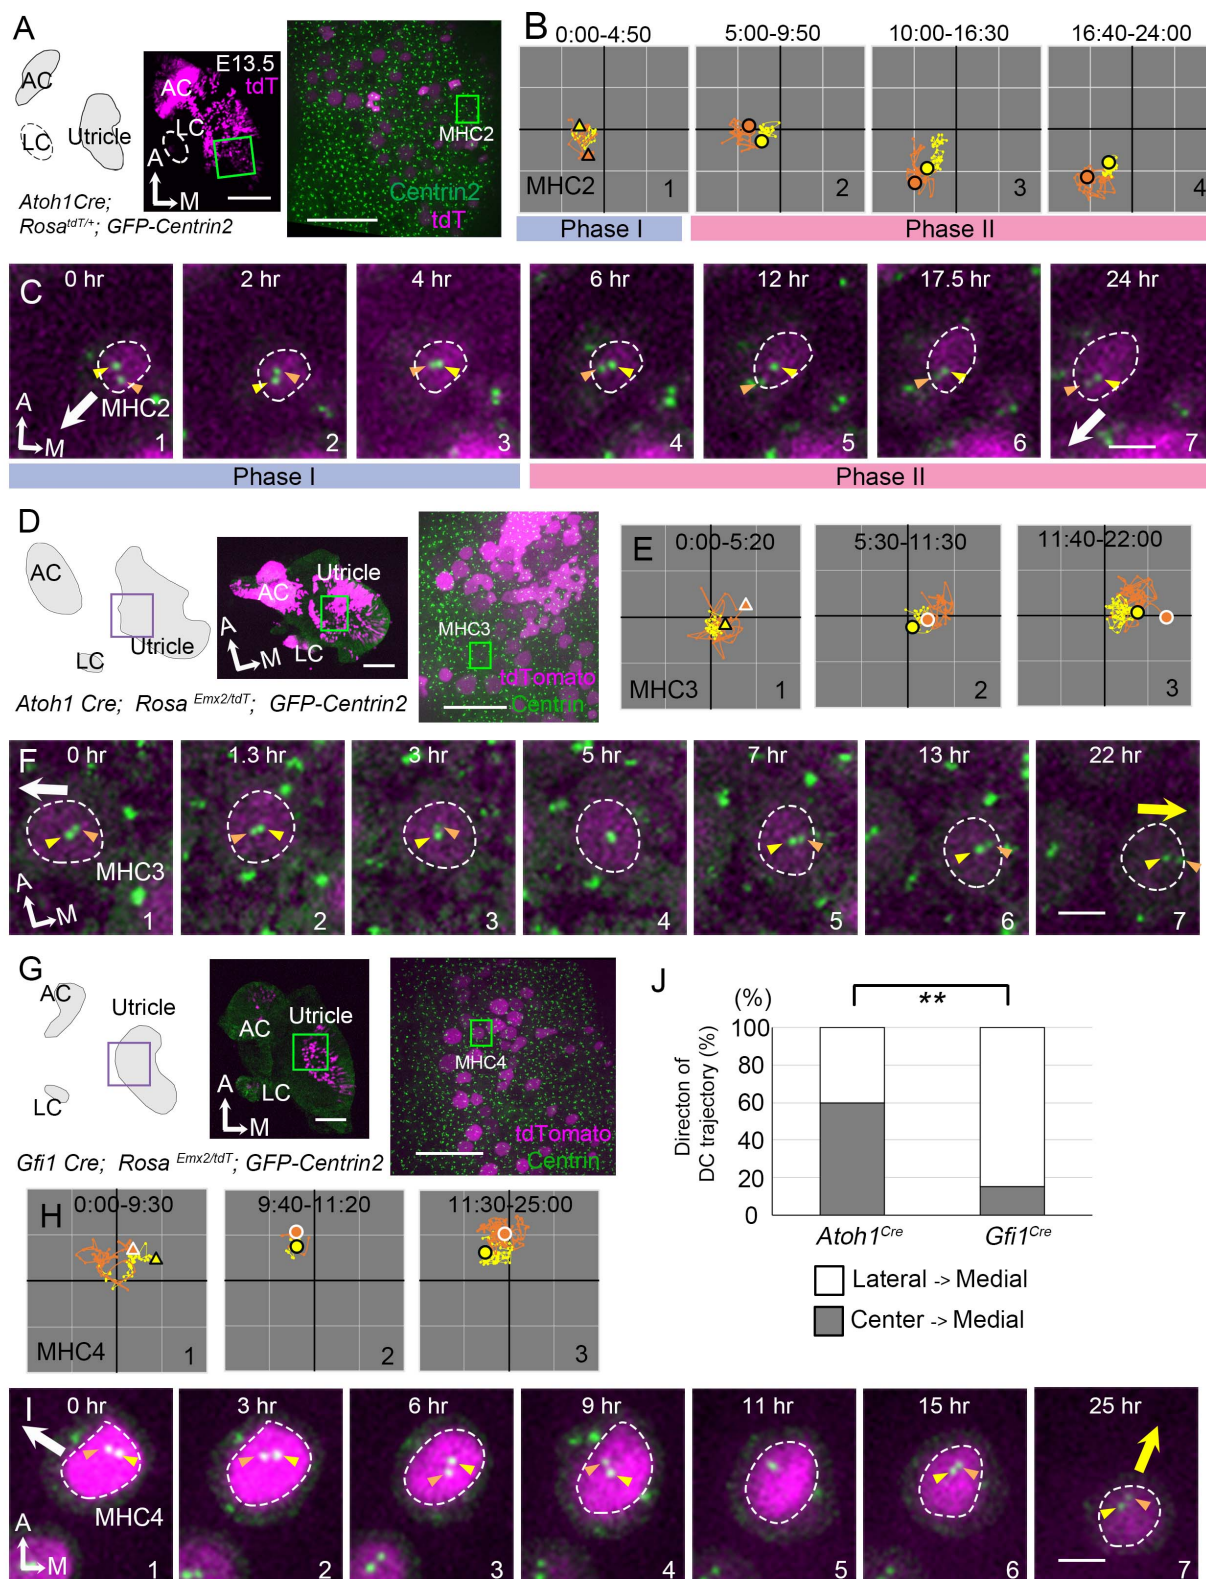

740  
741

**Figure 3. Trajectories of centriole movements in *Emx2* Gain-of-Function MHCs.**

742 (A-C) Schematic drawing and images of MHC2 in *Atoh1<sup>Cre</sup>; Rosa<sup>tdT/+</sup>; GFP-Centrin2* control  
743 utricle at E13.5 (A). (B) Trajectory and selected frames (C) from a recording of MC (yellow)  
744 and DC (orange) in MHC2. Trajectory is similar to MHC1 in Fig.2. Briefly, the DC is moving  
745 vigorously around the MC (Phase I), then the DC starts to move towards the periphery, where  
746 hair bundles should be established in this region of the utricle (white arrow). This trajectory is  
747 followed by the MC (Phase II). (D-F) Schematic drawing and low and high magnification  
748 images of MHC3 in *Atoh1<sup>Cre</sup>; Rosa<sup>Emx2/tdT</sup>; GFP-Centrin2* utricle at E13.5 (D). (E) Trajectory  
749 and selected apical views (F) of MC (yellow) and DC (orange) in MHC3 over-expressing *Emx2*.  
750 (E) The DC moves around the MC (#1). Then, the DC starts to move towards the medial side  
751 (#2), which is followed by the MC (#3). (F) In #1-4, the DC (orange arrowhead) is moving  
752 around the MC (yellow arrowhead) located in the center of the apical HC surface. In #5-7, the  
753 DC is moving towards the medial (yellow arrow) instead of the normal lateral (white arrow)  
754 utricle. This migration is followed by the MC. (G-I) Schematic drawing, low and high  
755 magnification images of MHC4 in *Gfi1<sup>Cre</sup>; Rosa<sup>Emx2/tdT</sup>; GFP-Centrin2* utricular explant (G).  
756 (H) Trajectory and selected apical views (I) of the MC and DC in MHC4 over-expressing *Emx2*.  
757 Between 0:00-9:30 hr (#1), the centrioles are migrating towards the lateral side of the HC with  
758 the DC more lateral than the MC. In #2 (9:40-11:20 hr), the DC starts to change its position to  
759 the medial side of the MC, which becomes more apparent in #3 (11:30-25:00 hr). (I) In panels 1-  
760 4, the DC (orange arrowhead) is heading towards the lateral side of the utricle (white arrow),  
761 then it changes course and moves to the medial side of MC (panels 6-7, yellow arrow). (J)  
762 Percentages of DC with two different trajectories in HCs ectopically expressing *Emx2* using  
763 either *Atoh1<sup>cre</sup>* or *Gfi<sup>cre</sup>*. Total number of HCs analyzed: *Atoh1<sup>cre</sup>*, n=15; *Gfi<sup>cre</sup>*, n=39. Scale bars:  
764 100  $\mu$ m (low mag) and 30  $\mu$ m (high mag) in (A) and apply to (D) and (G), 3  $\mu$ m in (C) and  
765 applies to (F) and (I). \*\* P<0.01.  
766



767

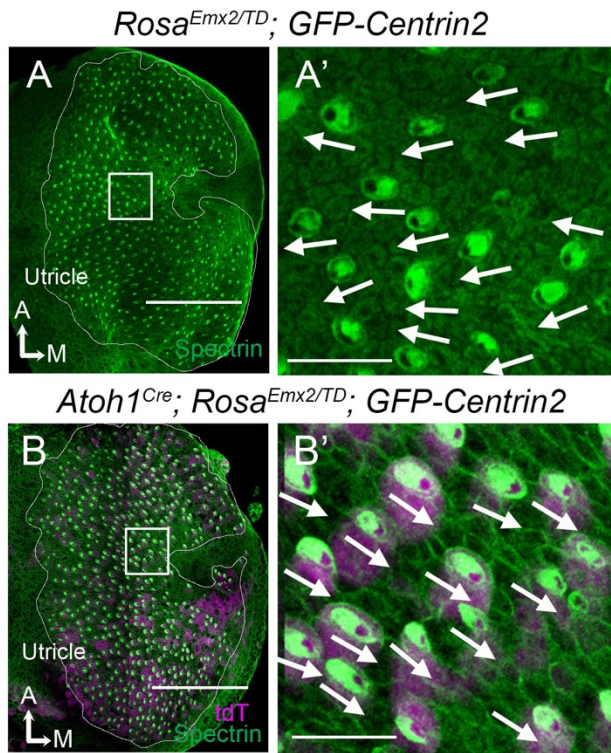

768

769

770 **Figure Supplement 3a. Gain-of-function of *Emx2* reverses hair bundle orientation in MHCs**

771 **of *Atoh1*<sup>Cre</sup>; *Rosa*<sup>*Emx2/tdT*</sup>; *GFP-Centrin2* utricles.** (A) Low magnification image of a

772 *Rosa*<sup>*Emx2/tdT*</sup>; *GFP-Centrin2* utricule at E15.5. (A') High magnification image of the rectangular

773 area in (A), showing normal lateral-oriented hair bundles in the medial utricule (white arrows)

774 based on  $\beta$ 2-spectrin immunostaining (green color). The void of  $\beta$ 2-spectrin staining indicates

775 the position of the kinocilium and thus the orientation of the hair bundle. (B) Low magnification

776 image of an *Atoh1*<sup>Cre</sup>; *Rosa*<sup>*Emx2/tdT*</sup>; *GFP-Centrin2* utricule at E15.5, in which HCs are tdTomato-

777 positive (magenta) and stained with anti- $\beta$ 2 spectrin antibodies (green). (B') High magnification

778 of the rectangular area in (B) showing that hair bundles in the medial utricule all point towards the

779 medial (white arrows) instead of the lateral direction as in controls (A'). The utricule is fan-

780 shaped. Therefore, depending on selected regions, hair bundle orientation is not necessarily

781 consistent among regions but always consistent within a region. Scale bars: 100  $\mu$ m in (A, B)

782 and 10  $\mu$ m in (A', B').

783

784

785

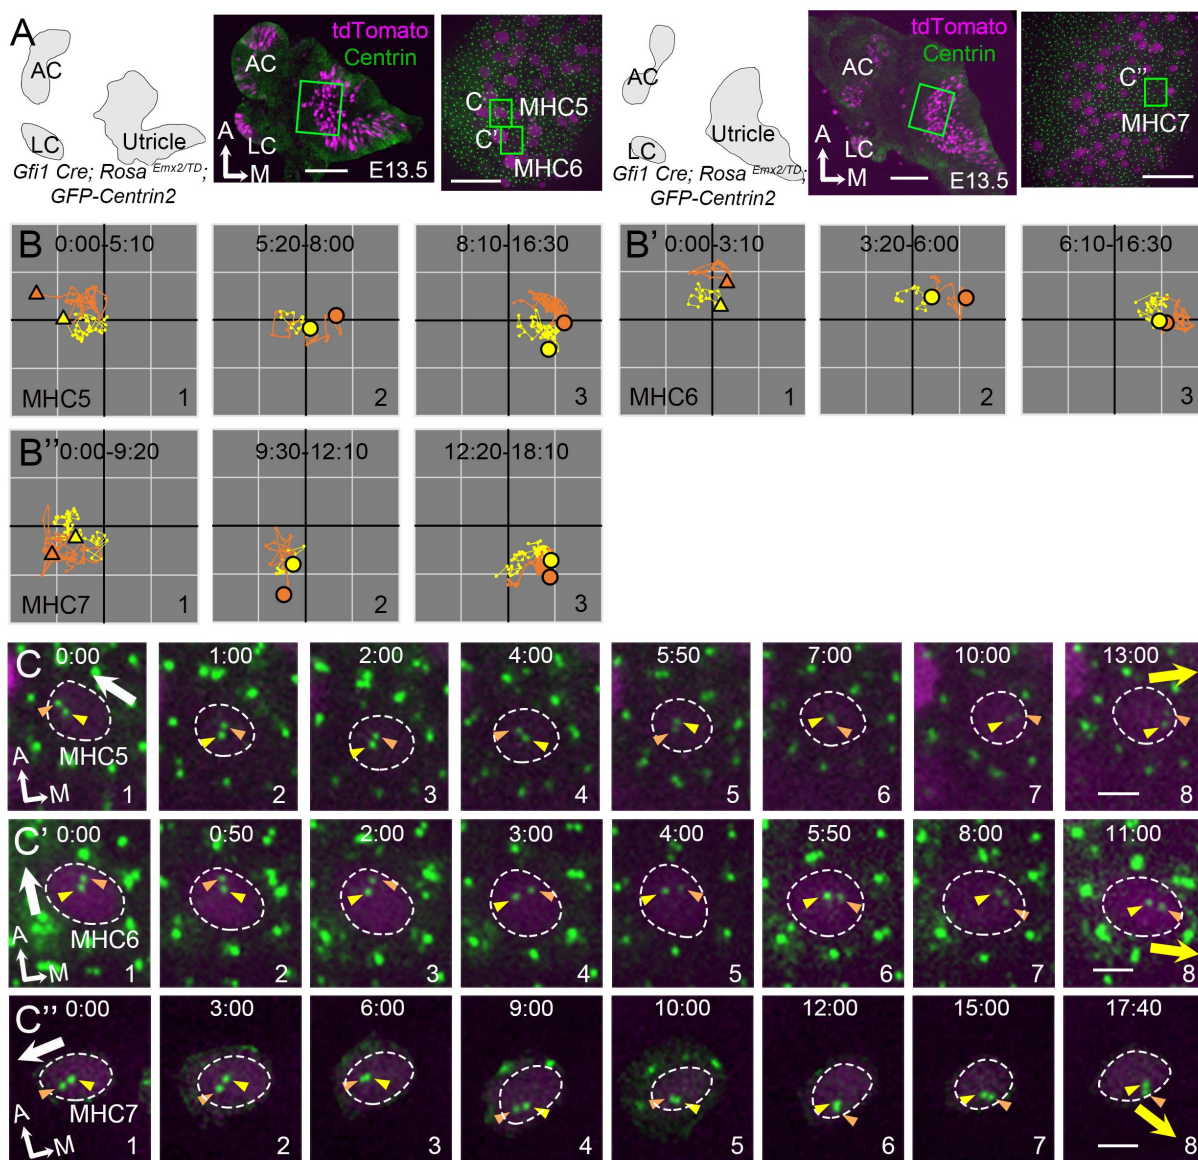

786  
 787 **Figure Supplement 3b. Centriole trajectories in *Emx2* Gain-of-Function MHCs using**  
 788 ***Gfi1<sup>Cre</sup>*.** (A) Schematic drawings, low and high magnification images of two *Gfi1<sup>Cre</sup>;*  
 789 *Rosa<sup>Emx2/tdT</sup>; GFP-Centrin2* utricular explants. (B-B'') The trajectory of MC and DC in MHC5  
 790 (B), MHC6 (B'), and MHC7 (B''). At first, both centrioles are positioned in the lateral side of  
 791 the HC (B-B'', #1). Then, the daughter centriole starts to reverse its direction and moves towards  
 792 the medial side of the HC (B-B'', #2), followed by the mother centriole (B-B'', #3). Yellow and  
 793 orange triangles show the initial MC and DC positions in #1, whereas yellow and orange circled  
 794 dots represent the final positions in Panels #2-#3. Each small grid is 1.25 x 1.25 μm. (C-C'')  
 795 Selected apical views of a live-imaging recording of MHC5 (C), MHC6 (C') and MHC7 (C'')  
 796 that overexpress *Emx2*. Initially, the DC (orange arrowhead) is located by the lateral side (white  
 797 arrow, MHC5, MHC7 #1-4, MHC6 #1-3), then it changes course and moves to the medial side of  
 798 the MC (yellow arrow, MHC5, #7-8, MHC6, #4-8). Scale bars: 100 μm (low mag) and 30 μm  
 799 (high mag) in (A), and 3 μm in (C), (C') and (C'').  
 800

801

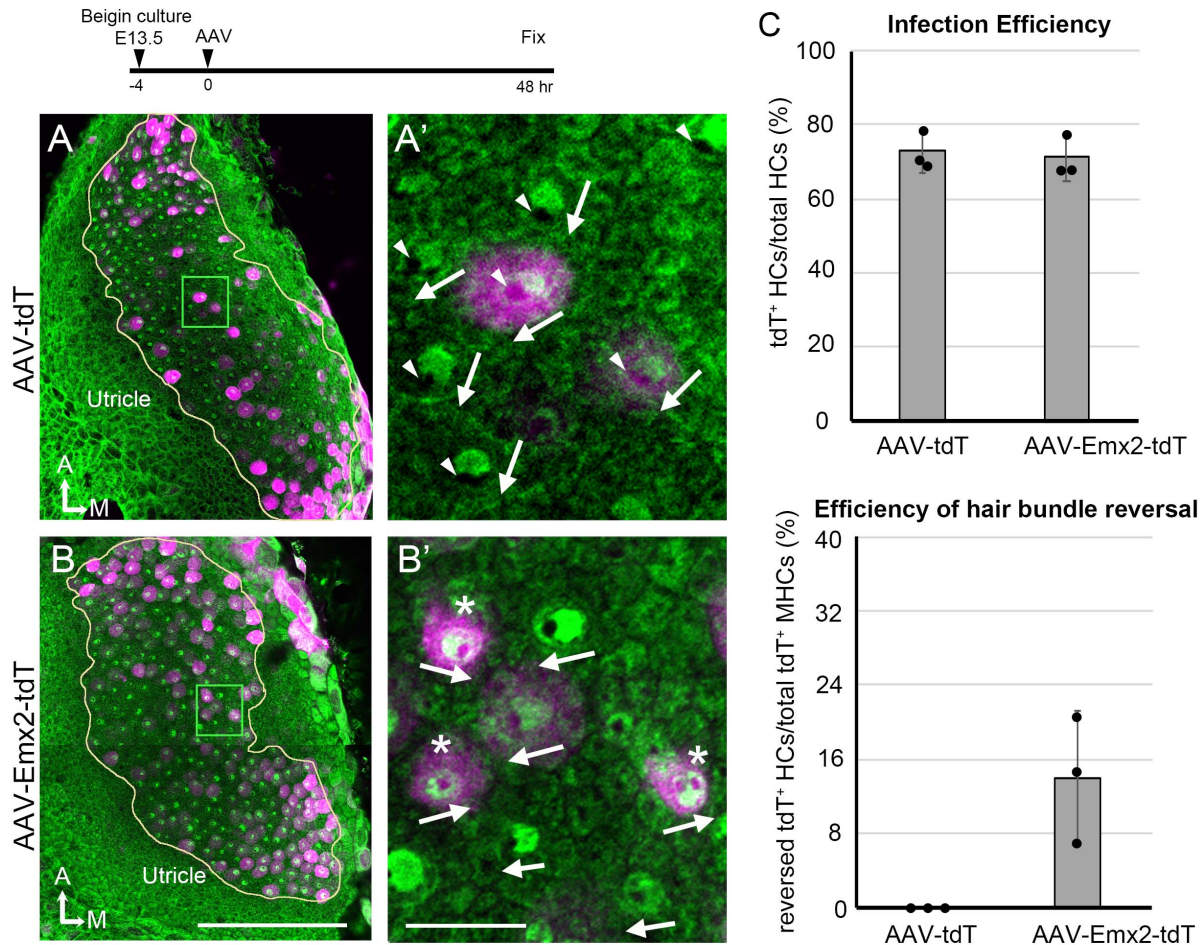

802  
 803 **Figure 4. AAV-Emx2 infections reverse hair bundles in MHCs.** (A, A') Low (A) and high  
 804 magnification (A') images of the rectangular area of a control explant infected with AAV-tdT  
 805 (tdT: magenta) and stained with anti- $\beta$ 2-spectrin antibodies (green), in which the absence of  
 806 staining indicates the kinocilium location (arrowhead) and HC orientation (arrows). The two  
 807 AAV-tdT infected HCs (magenta) show hair bundle orientation similar to non-infected HCs.  
 808 (B,B') Low (B) and high magnification (B') images of the rectangular area of an utricular  
 809 explant infected with AAV-Emx2-tdT (tdT: magenta), stained with anti- $\beta$ 2-spectrin antibodies  
 810 (green). Some of the AAV-Emx2-tdT infected HCs show reversed hair bundle orientation  
 811 (asterisk) from the rest of the non-infected HCs. (C) Efficiency of viral infections and efficiency  
 812 of hair bundle reversal among infected HCs (n=3 experiments for each condition). Error bars  
 813 represent SD. Scale bars: 100  $\mu$ m in (B) and applies to (A), and 10  $\mu$ m in (B') and applies to  
 814 (A').

815  
 816

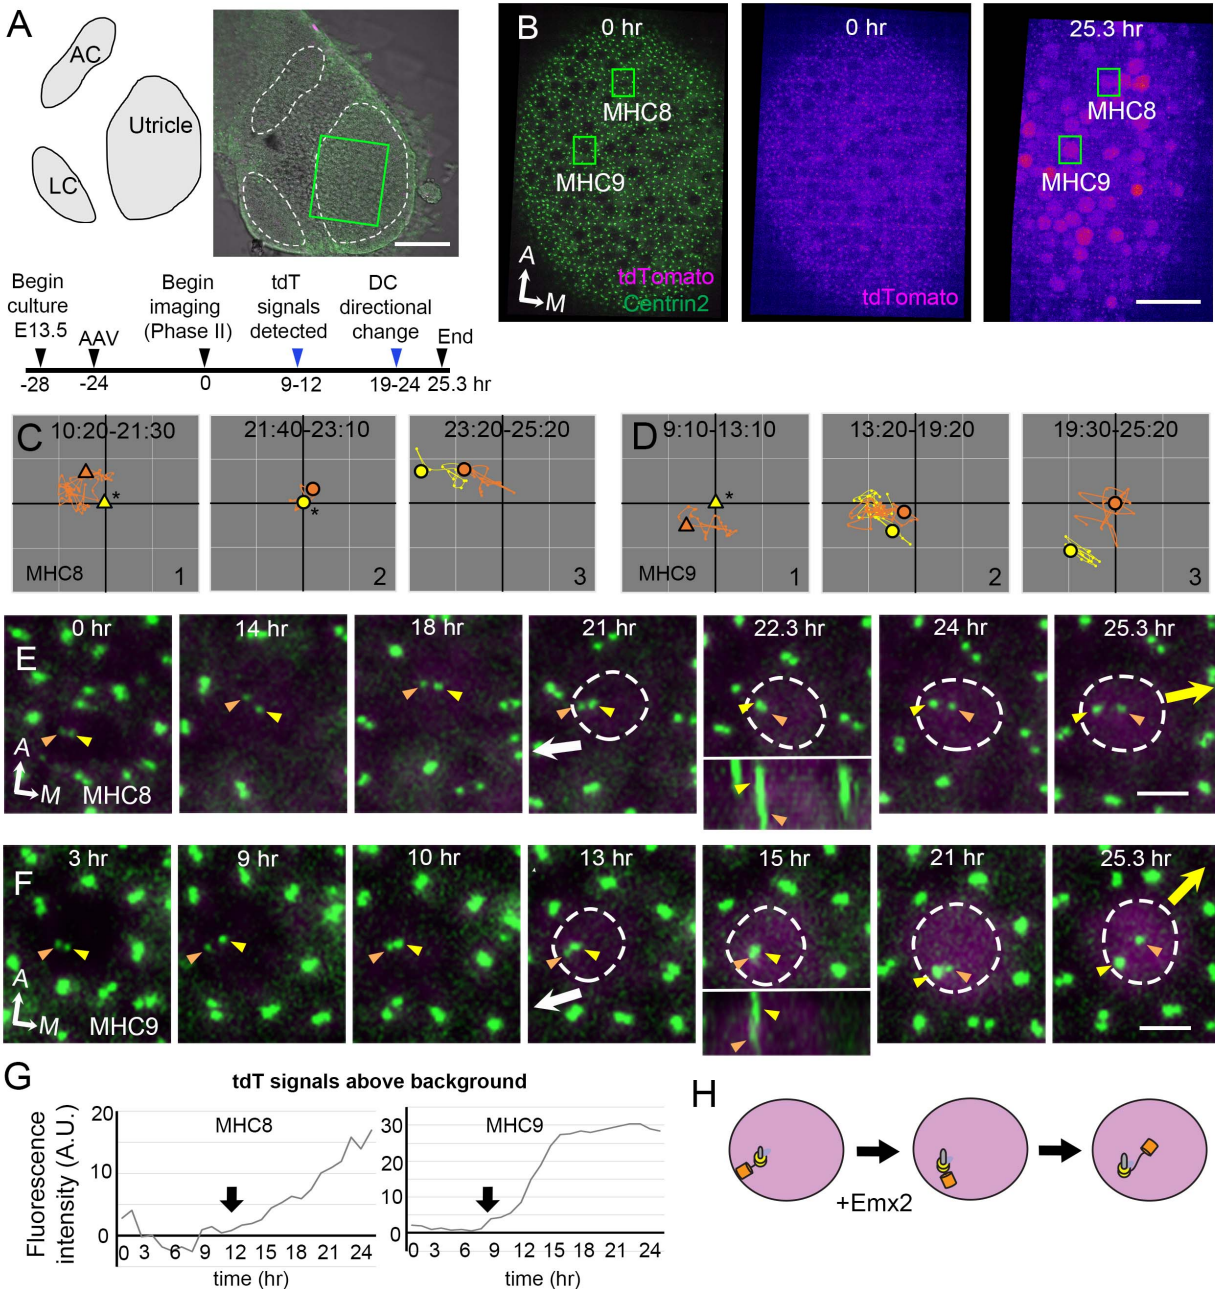

817

818 **Figure 5. Altered DC trajectory in MHCs infected with AAV-Emx2**

819 (A) Schematic and low magnification image of the *GFP-Centrin2* utricular explant infected with

820 AAV-Emx2-tdT at E13.5. The timeline of experimental treatments (black arrowheads) and

821 observations (blue arrowheads) are shown. (B) A utricular explant at the beginning (0:00) and

822 end (25:20) of a time-lapse recording showing clear tdTomato-positive cells by the end of

823 recording. (C, D) The trajectory of the MC and DC in MHC8 and MHC9. Initially, the DC

824 (orange triangle, #1) is positioned lateral to the MC (yellow triangle) at the center (asterisk).

825 Then, the DC (orange dot) moves sporadically around MC (yellow dot, #2), followed by DC

826 moving medial to the MC in #3. (E, F) Selected frames of the recording of MHC8 and MHC9.

827 At the beginning, the DC is located by the lateral side (white arrow) of each HC. Then, the DC

828 overlaps with the MC briefly at 22.3 hr for MHC8 and 15 hr for MHC9 during recording (insets)

829 showing side views), followed by the DC moving medial to the MC towards the medial direction  
830 (yellow arrow). (G) tdTomato expression compared to the background level, indicating  
831 tdTomato signals exceeded background after 12 (MHC8) and 9 hrs (MHC9) of recordings  
832 (arrows). (H) Schematic of centriole movements in the presence of Emx2. Scale bars: 100  $\mu\text{m}$   
833 in (A), 30  $\mu\text{m}$  in (B) and 3  $\mu\text{m}$  in (E) and (F).  
834  
835  
836

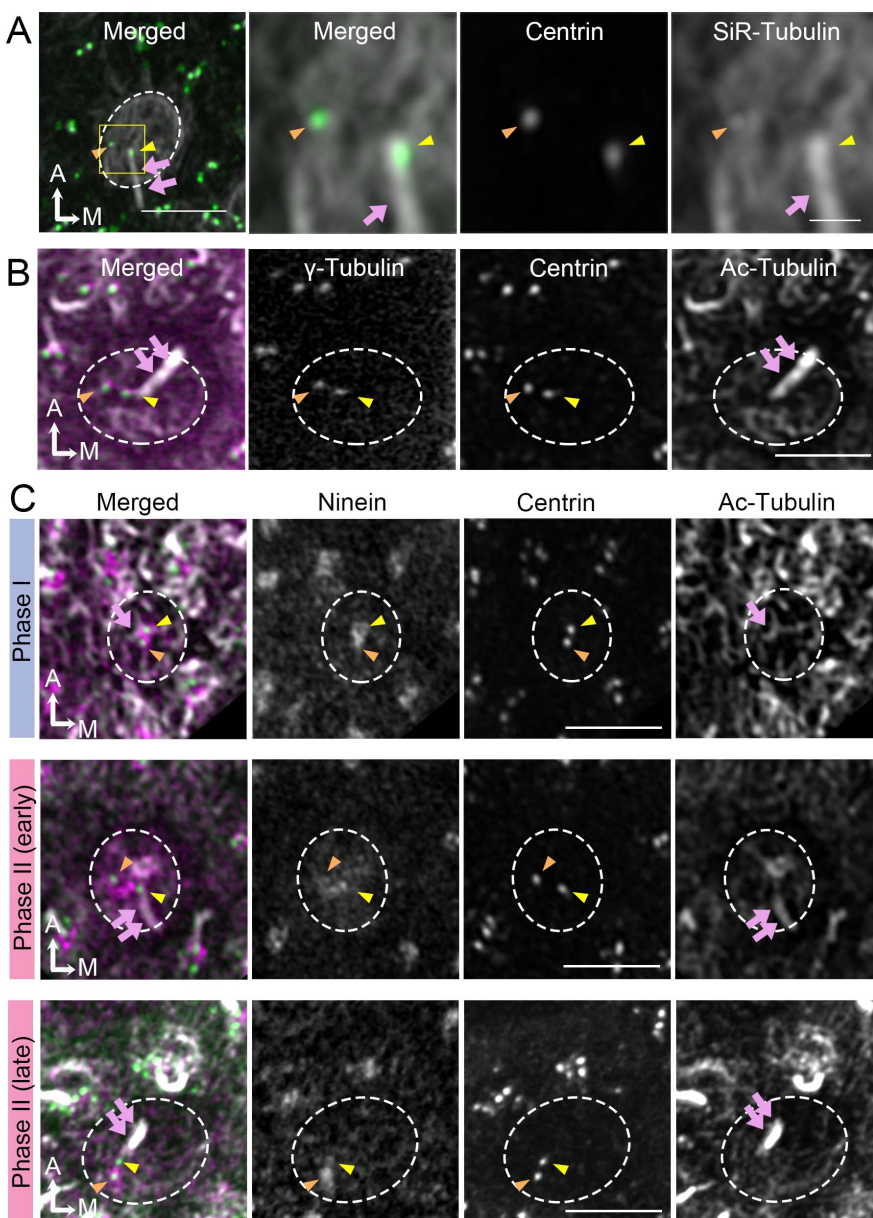

837  
838

839 **Figure 6. Broaden ninein localization during centriole migration.**  
840 (A) SiR-tubulin (white) labeling of an MHC of E13.5 *Atoh1<sup>Cre</sup>; Rosa<sup>tdT/+</sup>; GFP-Centrin2* utricle  
841 at Phase II. The magnified views of the yellow rectangular area in the left panel are shown in the  
842 three right panels, illustrating that both centrioles (green in the merged picture) are associated  
843 with the microtubule network. MC, yellow arrowhead; DC, orange arrowhead; kinocilium, pink  
844 arrows. Dotted white lines indicate apical surface of the HC. (B)  $\gamma$ -tubulin expression of an  
845 MHC at Phase II. DC and MC show similar expression of  $\gamma$ -tubulin (magenta in the merged  
846 picture). Acetylated tubulin labels mature microtubule and the kinocilium. (C) Immunostaining  
847 of ninein in MHCs in Phase I, early and late Phase II. Phase I (outlined) and late Phase II HCs  
848 show centrosomal ninein (magenta on merged picture) staining. At the beginning of Phase II,  
849 ninein staining is diffuse and broader than centrioles. Scale bars: 3  $\mu$ m in the left panel in (A)  
850 and applies to (B-C'), 1  $\mu$ m in the three right panels of (A).

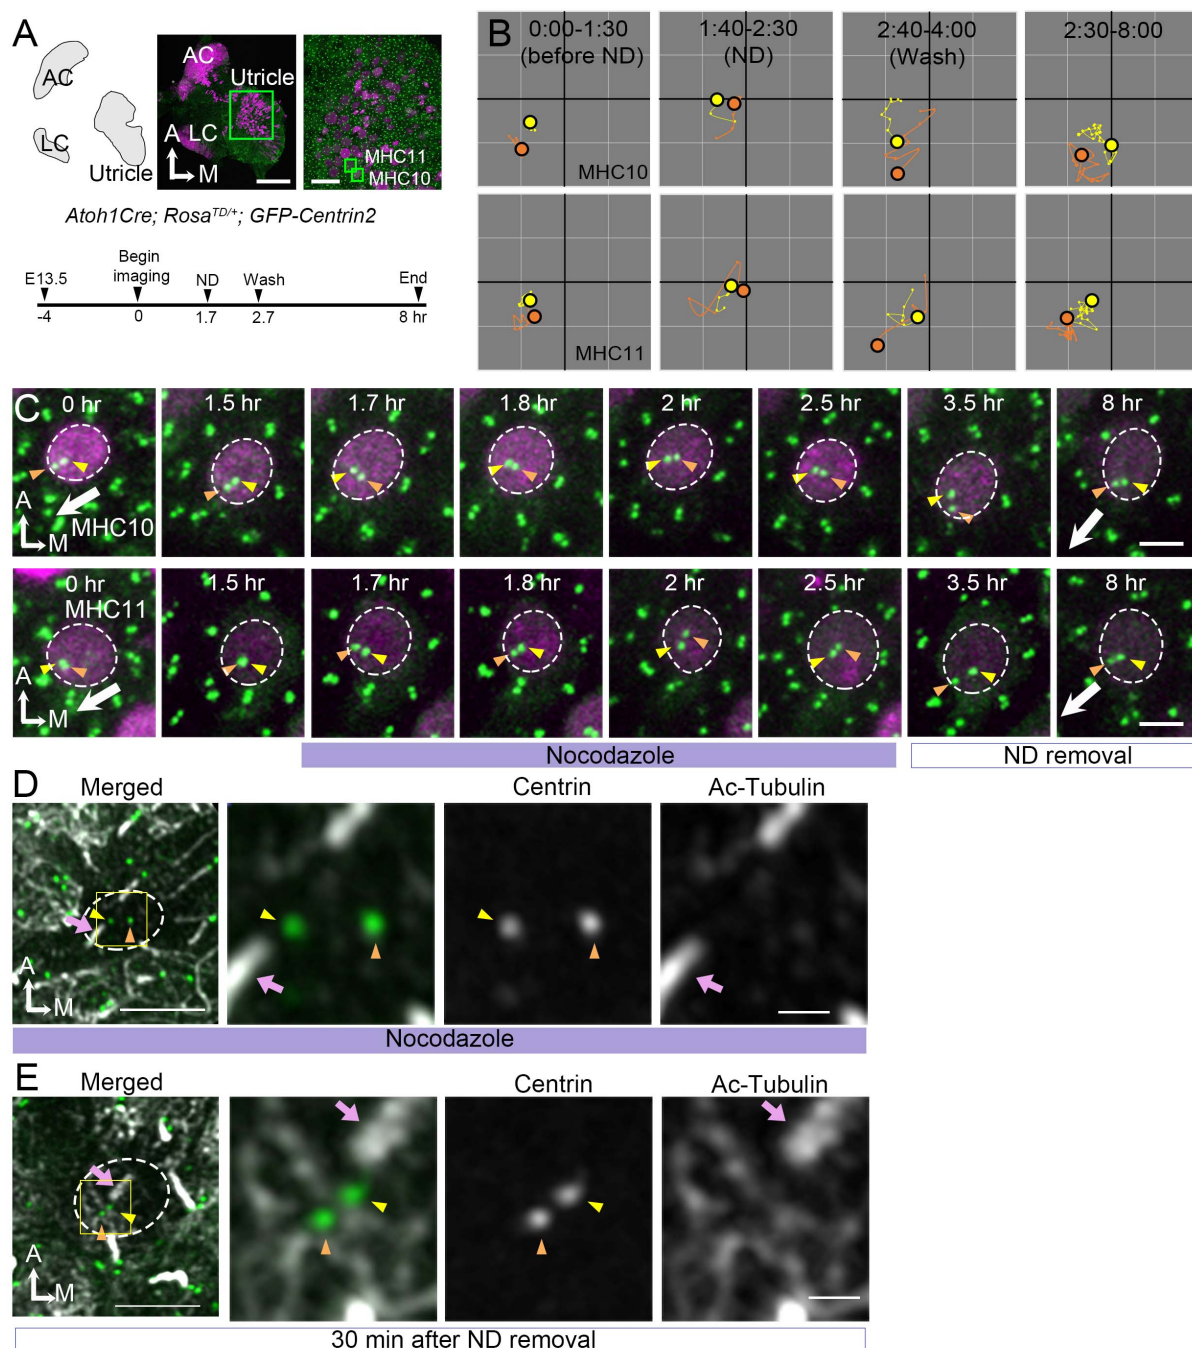

851  
852 **Figure 7. Centrioles lose their lateral position after nocodazole treatments.** (A) Schematic,  
853 low and high magnifications of an *Atoh1<sup>Cre</sup>; Rosa<sup>td/+</sup>; GFP-Centrin2* utricular explant. The  
854 timeline indicates the experimental treatments. (B) The trajectory of MC and DC in MHC10 and  
855 MHC11. Before the introduction of nocodazole (ND, 0:00-1:30 hr), the DC is located more  
856 peripherally than the MC, towards the lateral edge of HC (Phase II). The position of the DC and  
857 MC changes during ND treatment and they move back to the center of the HC with DC moving  
858 ahead of MC. After removal of the ND, centrioles return to the polarized location again with DC  
859 moving ahead of MC. (C) Selected frames of MHC10 and MHC11 before (0 hr), during (1.7-2.5

860 hr) and after washing out (3.5-8 hr) of ND. Before ND treatment, the DC is positioned lateral to  
861 the MC towards the direction where hair bundles will be established (white arrow). This  
862 relationship is disrupted during ND treatment with both DC and MC relocating to the center of  
863 the HC and the DC is more medial than the MC at the end of drug treatment (2.5 hr). After drug  
864 removal, the DC returns to its original position within 1 hr, which is followed by the MC (8hr).  
865 (D) The nocodazole-treated MHC shows mispositioned centrioles (MC, yellow arrowhead; DC,  
866 orange arrowhead) that are no longer asymmetrically located in the periphery. The three panels  
867 on the right are merged, single centrin and acetylated tubulin images of the rectangular area in  
868 the left panel. Tubulin arrays are absent in the cytoplasm of HC. (E) An MHC after removal of  
869 ND for 30 min shows centrioles returning to their peripheral location. The three panels on the  
870 right are magnifications of the rectangular area in the left panel. Tubulin arrays (white) are  
871 radiating from the centrioles to the periphery. Scale bars: 100  $\mu\text{m}$  (low mag) and 30  $\mu\text{m}$  (high  
872 mag) in (A), 3  $\mu\text{m}$  in (C) and the first panel in (D) and (E), and 1  $\mu\text{m}$  in high mag of (D) and (E).  
873  
874



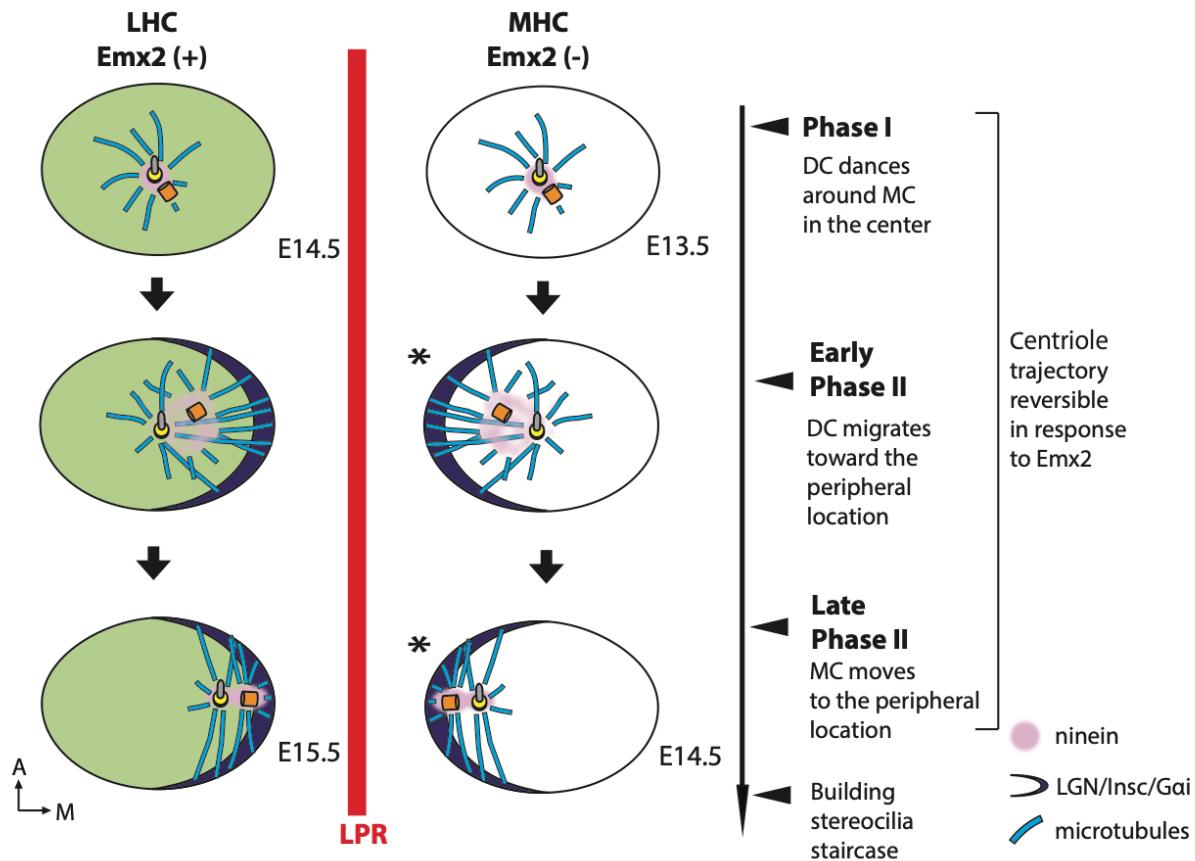

875  
 876 **Fig. 8 Summary of centriole trajectory during hair bundle establishment in nascent**  
 877 **utricular HCs.** In Emx2-negative MHCs, Phase I is represented by MC located in the apical  
 878 center of HCs with the DC dancing around the MC. Ninein is associated with the centrioles,  
 879 which serves as the nucleation center for microtubules. In early Phase II, when DC migrates  
 880 toward the peripheral side, the MC starts to follow the direction of the DC and the peripheral  
 881 crescent LGN/Insc/Gai complex starts to be established (Ezan et al., 2013, Tarchini et al., 2013).  
 882 The broad distribution of ninein surrounding both centrioles is likely to anchor the minus end of  
 883 microtubules and facilitates centriole migration to the periphery. By the end of Phase II, both  
 884 MC and DC are located in the periphery and ninein becomes restricted to the centrioles again.  
 885 Centriole trajectory in both Phase I and II are reversible in the presence of Emx2 but  
 886 responsiveness to Emx2 decreases over time (Jiang et al., 2017). Emx2-positive LHCs (green)  
 887 show similar but opposite trajectory pattern of centriolar migration. Nevertheless, LGN/Insc/Gai  
 888 may be dispensable for hair bundle establishment in the MHCs since blocking Gai with pertussis  
 889 toxin does not appear to affect bundle orientation (asterisk).

890 Video 1

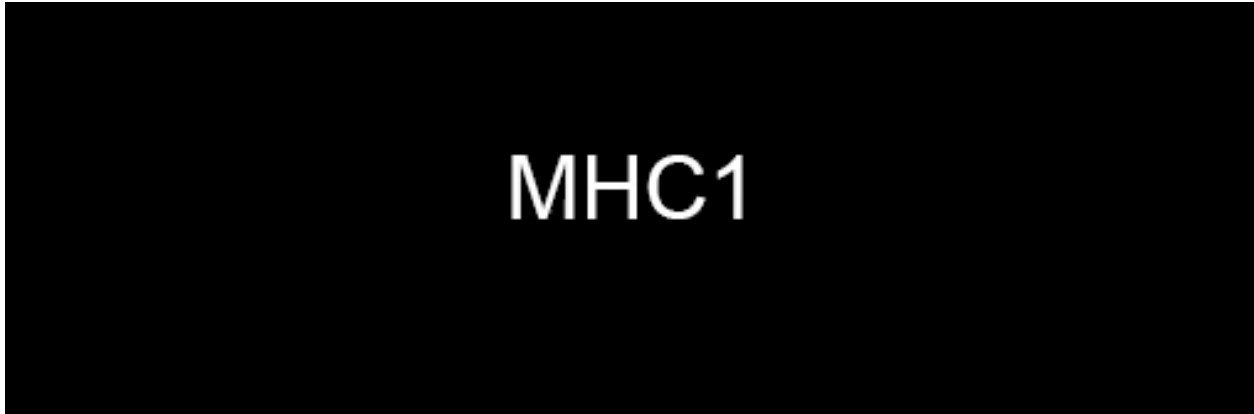

891  
892 Time-lapse videos of the apical view (left panel) and the reconstructed image (right panel) of  
893 MHC1 and MHC2 in *Atoh1<sup>Cre</sup>; Rosa<sup>tdT/+</sup>; GFP-Centrin2* utricle showing the DC first moves  
894 sporadically around the MC. Then, the DC moves towards the lateral side (white arrow). This  
895 trajectory is followed by the MC. Yellow and red spheres indicate mother and daughter  
896 centrioles, respectively. Magenta indicates tdTomato signal within the HC. Scale bar: 3  $\mu\text{m}$ .  
897 Play back speed: 7 frames per second.  
898  
899

900 Video 2

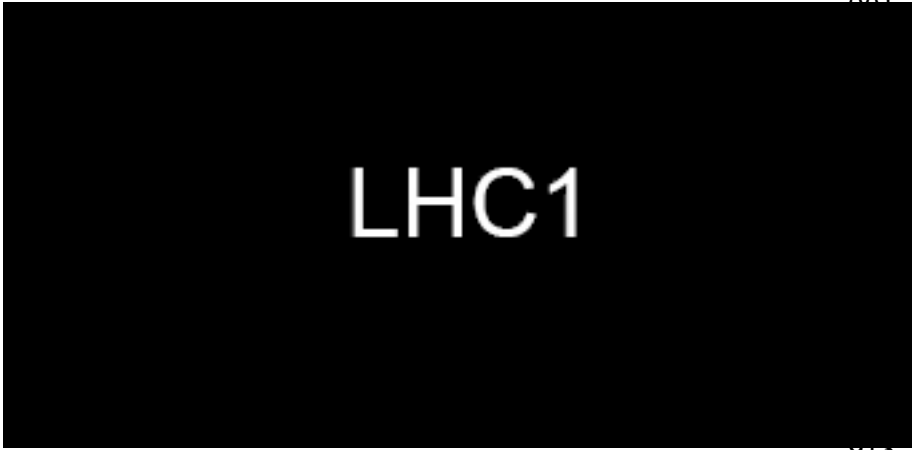

914  
915 Time-lapse videos of the apical view (left panel) and the reconstructed image (right panel) of  
916 LHC1 and LHC2 in *Atoh1<sup>Cre</sup>; Rosa<sup>tdT/+</sup>; GFP-Centrin2* utricle, showing the DC first moves  
917 sporadically around the MC. Then, the DC moves towards the medial side (white arrow), which  
918 is followed by the MC. Yellow and red spheres indicate mother and daughter centrioles,  
919 respectively. Magenta indicates tdTomato signal within the HC. Scale bar: 3  $\mu\text{m}$ . Play back  
920 speed: 7 frames per second.

921  
922  
923

924 Video 3

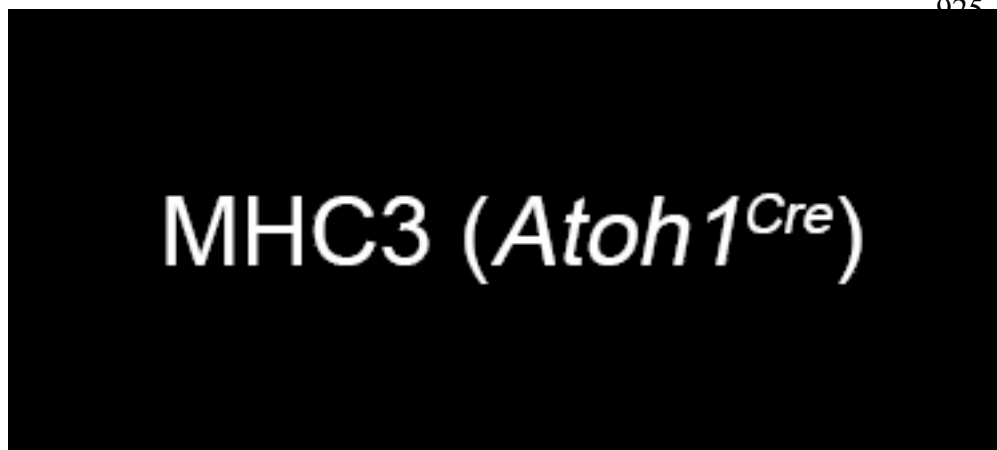

938  
939 Time-lapse videos of the apical view (left panel) and the reconstructed image (right panel) of  
940 MHC3 (*Atoh1<sup>Cre</sup>; Rosa<sup>Emx2/tdT</sup>; GFP-Centrin2*) and MHC4 (*Gfi1<sup>Cre</sup>; Rosa<sup>Emx2/tdT</sup>; GFP-Centrin2*).  
941 The DC in MHC3 first moves sporadically around the MC, similar to other MHCs (video 1).  
942 Then, the DC moves towards the medial side (yellow arrow) in an opposite direction from  
943 normal MHCs (white arrow). This movement is followed by the MC. The DC in MHC4 first  
944 leads the MC moving towards the lateral side (white arrow) and then it changes course and  
945 moves medial to the MC towards the medial side (yellow arrow). Yellow and red spheres  
946 indicate mother and daughter centrioles, respectively. Magenta indicates tdTomato signal within  
947 the HC. Scale bar: 3  $\mu\text{m}$ . Play back speed: 7 frames per second.  
948  
949  
950

951 Video 4

952



## MHC8 (*AAV-Emx2*)

965 Time-lapse videos of the apical view (left panel) and the reconstructed image (right panel) of  
966 MHC8 and MHC9 in *GFP-Centrin2* utricular explant infected with AAV2.7m8-CAG-Emx2-  
967 P2A-tdTomato. In both MHC8 and MHC9, the DC starts out on the lateral side of the MC  
968 towards the lateral side of the utricle (white arrow). Then, it changes course to be on the medial  
969 side of the MC towards the medial utricle (yellow arrow). Yellow and red spheres indicate  
970 mother and daughter centrioles, respectively. Magenta indicates tdTomato signal in the infected  
971 HC cytoplasm. Scale bar: 3  $\mu\text{m}$ . Playback speed: 7 frames per second.

972

973

974

975 Video 5

976

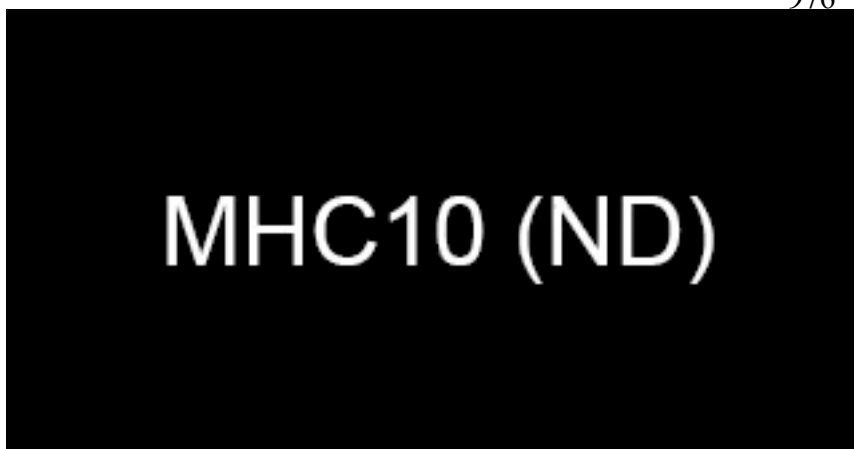

989  
990 Time-lapse videos of the apical view (left panel) and the reconstructed image (right panel) of  
991 MHC 10 and MHC11 in *Atoh1<sup>Cre</sup>; Rosa<sup>tdT/+</sup>; GFP-Centrin2* utricle, showing that the introduction  
992 of nocodazole causes the lateral-positioned centrioles (white arrow) to spring back to the center  
993 of the HC and then they return to the peripheral position after nocodazole removal. Yellow and  
994 red spheres indicate mother and daughter centrioles, respectively. Magenta indicates tdTomato  
995 signal in the HC cytoplasm. Scale bar: 3  $\mu\text{m}$ . Play back speed: 3 frames per second.

996

997

998

999
